# Supplementary material for: TAPBPR promotes antigen loading on MHC-I molecules using a peptide trap
Source: PubMed Central journal article supplement (PMC8154891; doi:10.1038/s41467-021-23225-6), 2021-05-26
Supplement: 41467_2021_23225_MOESM1_ESM.pdf [file 41467_2021_23225_MOESM1_ESM.pdf]

1 **Supplementary Information**

2 **TAPBPR Promotes Antigen Loading on MHC-I Molecules Using a Peptide Trap**

3 Andrew C. McShan<sup>1†</sup>, Christine A. Devlin<sup>2†</sup>, Giora I. Morozov<sup>1</sup>, Sarah A. Overall<sup>3</sup>, Danai  
4 Moschidi<sup>3</sup>, Neha Akella<sup>2</sup>, Erik Procko<sup>2\*</sup> and Nikolaos G. Sgourakis<sup>1,4\*</sup>

5 <sup>1</sup>Center for Computational and Genomic Medicine, Department of Pathology and Laboratory  
6 Medicine, The Children's Hospital of Philadelphia, 3401 Civic Center Blvd, Philadelphia, PA,  
7 19104, USA

8 <sup>2</sup>Department of Biochemistry and Cancer Center at Illinois, University of Illinois, Urbana, IL  
9 61801, USA.

10 <sup>3</sup>Department of Chemistry and Biochemistry, University of California Santa Cruz, Santa Cruz,  
11 CA 95064, USA.

12 <sup>4</sup>Department of Biochemistry and Biophysics, Perelman School of Medicine, University of  
13 Pennsylvania, 3400 Civic Center Blvd, Philadelphia, PA, 19104, USA

14 † These authors contributed equally to this work.

15 \* To whom correspondence should be addressed: Erik Procko (procko@illinois.edu) or Nikolaos  
16 G. Sgourakis (Nikolaos.Sgourakis@Pennmedicine.upenn.edu).

17

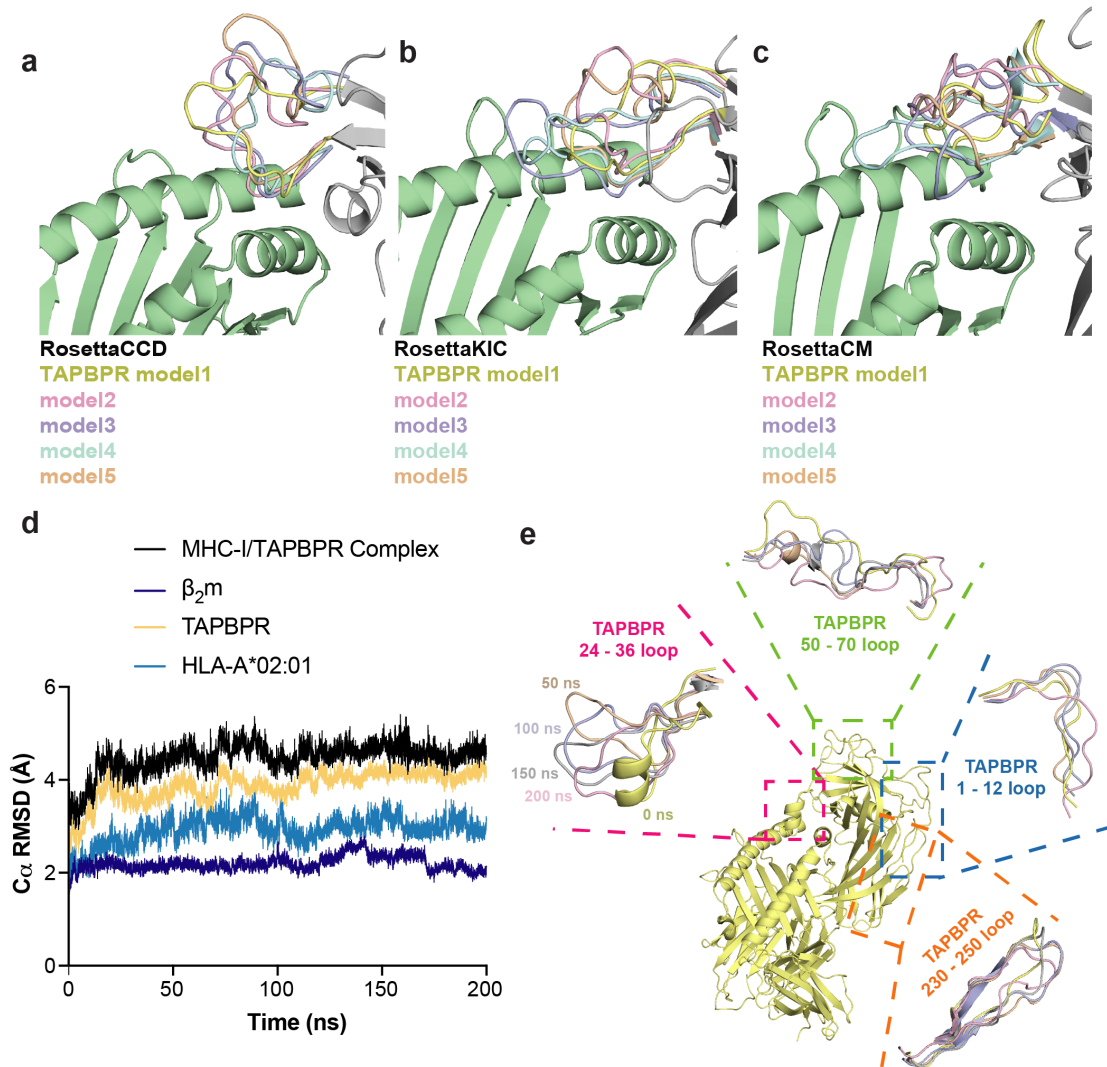

18  
 19 **Supplementary Fig. 1. Conformational variation of the TAPBPR G24-R36 loop.** (a-c)  
 20 Different Rosetta protocols are used to model the TAPBPR G24-R36 loop: (a) cyclic coordinate  
 21 descent (CCD), (b) kinematic closure (KIC), or (c) comparative modeling (CM). The template  
 22 used was PDB ID 5WER where HLA-A\*02:01 sequence was threaded onto H2-D<sup>d</sup> using the  
 23 partial\_thread application in Rosetta. HLA-A\*02:01 is green; TAPBPR is gray. The five lowest  
 24 energy models of the TAPBPR G24-R36 loop from a total of 1,000 decoys calculated are shown  
 25 in different colors. (d)  $C_{\alpha}$  root-mean-square deviation (RMSD, Å) from the initial structure as a  
 26 function of MD simulation time for the entire MHC-I/TAPBPR complex and for its individual  
 27 components. (e) Model of the peptide-deficient HLA-A\*02:01/h $\beta$ 2m/TAPBPR complex at 0 nsec  
 28 (start of the MD simulation) is shown in yellow. The dotted boxes highlight different loops present  
 29 in TAPBPR. The range of conformations sampled by each TAPBPR loop captured at different  
 30 times during the MD simulation are shown within each box. Only the TAPBPR loops are  
 31 highlighted for visual clarity but the entire peptide-deficient HLA-A\*02:01/h $\beta$ 2m/TAPBPR  
 32 complex was simulated.

33

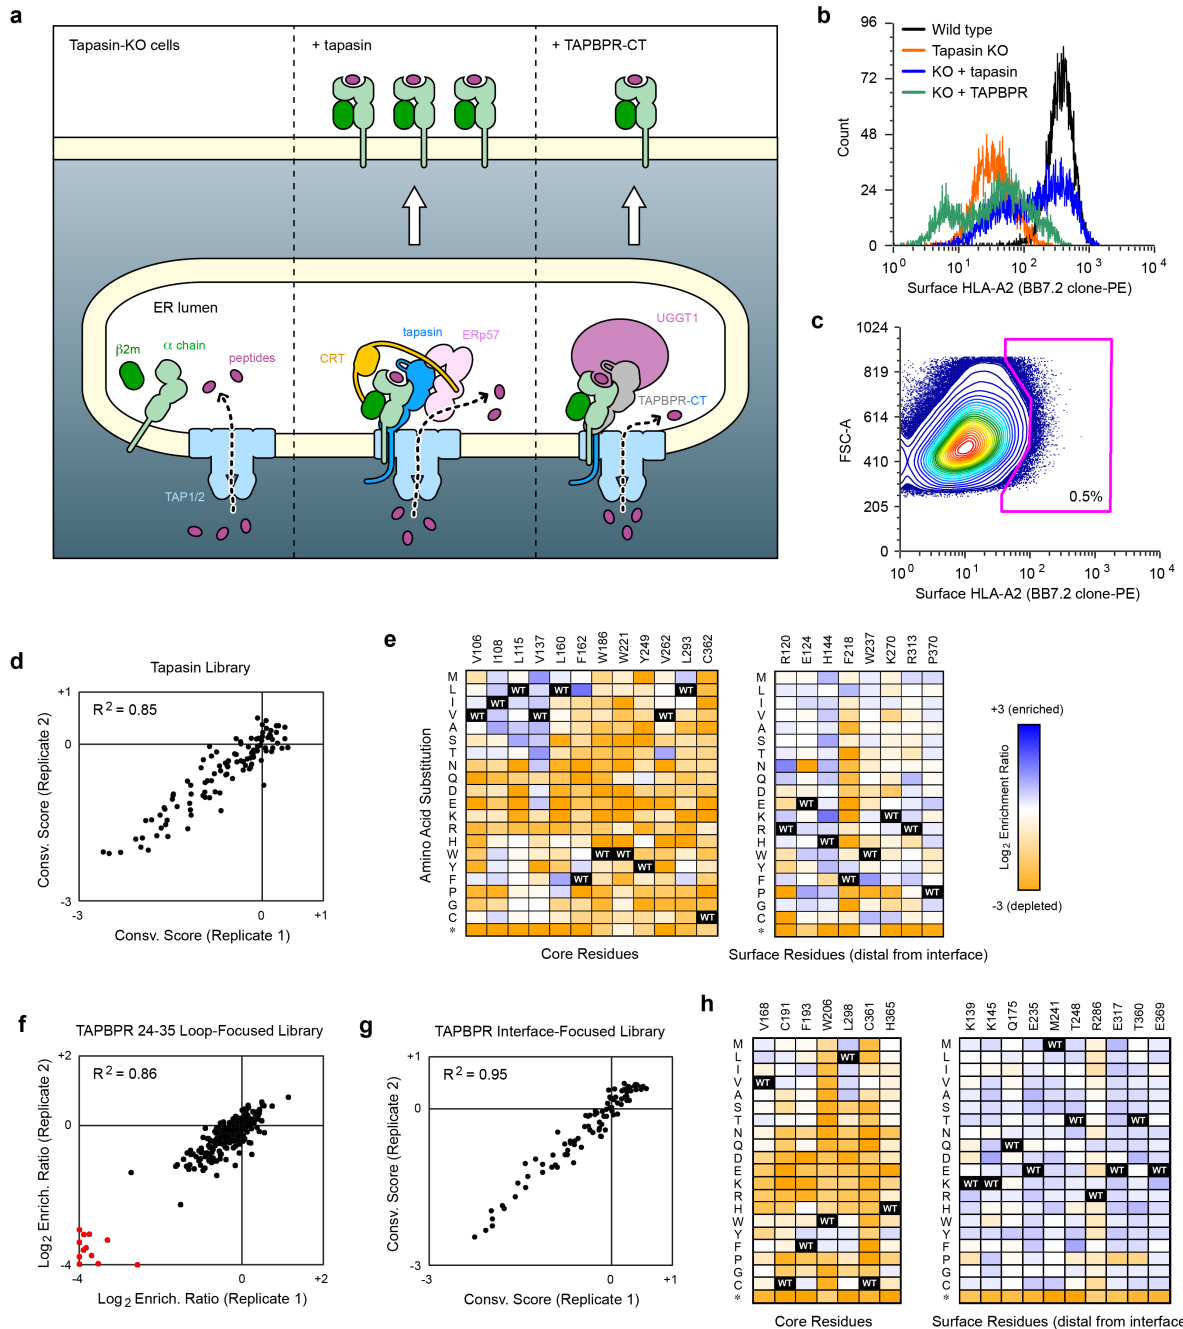

34  
35

36 **Supplementary Fig. 2. Selections based on functional replacement of endogenous tapasin for**  
 37 **HLA-A2 processing and surface trafficking.** (a) (Left) In tapasin-KO cells, HLA-A2 is poorly  
 38 processed and loaded, and is retained intracellularly. (Center) Expression of tapasin from a plasmid  
 39 rescues formation of the peptide-loading complex (PLC). HLA-A2 is now efficiently loaded with  
 40 peptides, folds, and traffics to the plasma membrane. (Right) Expression of a chimera between the  
 41 TAPBPR extracellular domains and the tapasin transmembrane and cytosolic domains partially  
 42 rescues HLA-A2 processing. We hypothesize that the tapasin C-terminal tail might help bring  
 43 TAPBPR and its associated glucosyltransferase UGGT1 in to a PLC-like complex with the TAP1/2

44 transporter. **(b)** Tapasin was knocked out by targeting indel mutations to exon 2 in Expi293F cells  
45 using Cas9/CRISPR-based editing (confirmed by deep sequencing genomic DNA; data deposited  
46 in GEO). Surface HLA-A\*02:01 expression was substantially reduced in tapasin-KO cells (red)  
47 compared to wild type cells (black). Surface trafficking of HLA-A\*02:01 was rescued by  
48 transfection with a plasmid encoding tapasin (blue), or partially rescued by over-expression of  
49 TAPBPR (green). When TAPBPR is over-expressed, a subset of cells also shows increased  
50 intracellular retention of HLA-A\*02:01 (represented by the left-most peak in green). **(c)** Libraries  
51 of tapasin or TAPBPR-CT variants were expressed in tapasin-KO Expi293F cells, and after first  
52 gating by scattering and viability, the 0.5 % of cells with the highest levels of endogenous HLA-  
53 A2 at the cell surface were collected (magenta gate). Under these transfection conditions, cells  
54 typically express no more than a single sequence variant, and most cells are negative. The example  
55 shown here is following transfection of a TAPBPR library. **(d)** Conservation scores (calculated  
56 from the mean of the  $\log_2$  enrichment ratios for each mutation at a residue position) following two  
57 independent selections of the tapasin library show close agreement. Tapasin residues with negative  
58 scores are tightly conserved for functional rescue of surface HLA-A\*02:01. **(e)** Following  
59 selection of the tapasin library and deep sequencing,  $\log_2$  enrichment ratios for mutations at control  
60 positions (in the core or at surface sites distal from the MHC-I interface) are plotted as heatmaps,  
61 colored from orange ( $\leq -3$ , i.e. depleted/deleterious) to pale/white (0, i.e. neutral) to dark blue ( $\geq$   
62  $+3$ , i.e. enriched). Due to read length limits for Illumina sequencing, enrichment of the wild type  
63 sequence in the experiment is unknown and shown in black. Mutated tapasin positions are on the  
64 horizontal axis, while amino acid substitutions are on the vertical axis (\*, stop codon). **(f)**  
65 Following selection of a 24-35 loop-focused TAPBPR-CT library,  $\log_2$  enrichment ratios for  
66 nonsynonymous mutations (black) in the 24-35 loop cluster near the origin. Nonsense mutations  
67 (red) are depleted. Data from two independent experiments show close agreement. **(g)**  
68 Conservation scores from the selection of a larger TAPBPR-CT library focused on the entire  
69 MHC-I interface are closely correlated between independent sorting experiments. **(h)** Heatmaps  
70 colored as in E, showing that core TAPBPR residues are generally restricted to hydrophobics (*left*)  
71 while surface TAPBPR residues distal from the MHC-I interface are mutationally tolerant (*right*).  
72

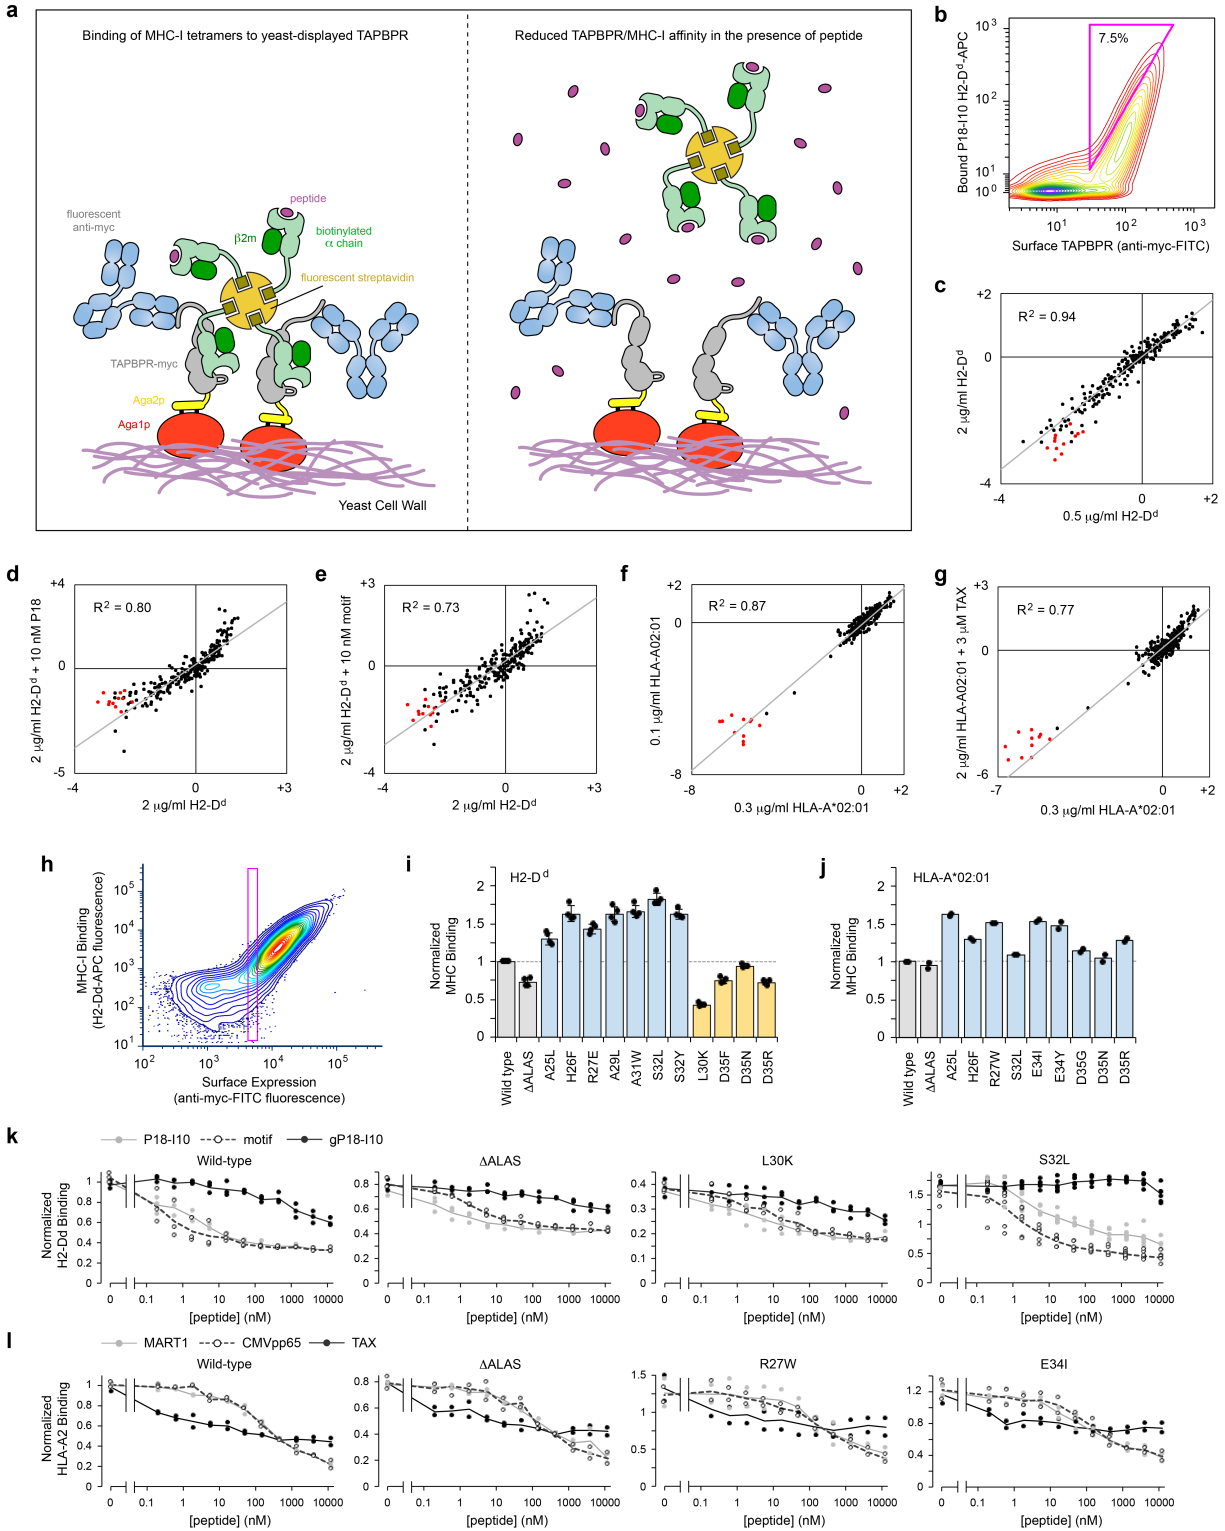

73  
74

75 **Supplementary Fig. 3. Yeast display for assessing how the sequence of the TAPBPR 24-35**  
76 **loop influences binding to folded MHC-I.** (a) The extracellular domains of TAPBPR are  
77 expressed on the surface of the yeast cell wall via an N-terminal fusion with Aga2p. A c-myc

78 epitope tag at the C-terminus is used for fluorescence detection of expression levels with anti-myc  
79 antibodies. MHC-I binding is measured by flow cytometry after incubation of the yeast with  
80 fluorescent pMHC-I tetramers. TAPBPR binds MHC-I with highest affinity when it is peptide  
81 free, and the addition of peptide reduces MHC-I binding to TAPBPR-expressing yeast. **(b)** The  
82 24-35 loop of TAPBPR was diversified by saturation mutagenesis. The yeast-displayed library  
83 was sorted under a variety of conditions for binding to tetramers of P18-I10-loaded H2-D<sup>d</sup> or  
84 TAX8-loaded HLA-A\*02:01, in the presence or absence of free peptides P18-I10 or motif (for  
85 H2-D<sup>d</sup>) or HTLV-1 TAX (for HLA-A\*02:01). The gating strategy for one of the sorting  
86 experiments is shown. In this example, yeast were incubated with 0.5 µg/ml H2-D<sup>d</sup> tetramer, and  
87 yeast expressing TAPBPR variants with the highest levels of binding were collected (magenta  
88 gate). MHC-I tetramer staining was below saturation (staining remained unsaturated up to at least  
89 10 µg/ml tetramer). **(c-g)** Yeast-displayed TAPBPR libraries were sorted for binding to MHC-I  
90 tetramers and the enrichment or depletion of mutations were calculated following Illumina  
91 sequencing of the naive and sorted populations. Comparisons are shown between different sorting  
92 experiments for the enrichment ratios of nonsynonymous (black) and nonsense (red) mutations in  
93 the TAPBPR 24-35 loop. Data are highly correlated between replicate experiments using different  
94 concentrations of H2-D<sup>d</sup> (c) or HLA-A\*02:01 (f). Enrichment ratios are qualitatively similar when  
95 free peptides P18-I10 (d), motif (e), or TAX (g) are co-incubated with H2-D<sup>d</sup> (d, e) or HLA-  
96 A\*02:01 (g). **(h)** Yeast displaying surface TAPBPR were dual stained with P18-I10-loaded H2-  
97 D<sup>d</sup>-APC tetramers and anti-myc-FITC for simultaneous detection by flow cytometry of bound  
98 MHC-I versus TAPBPR expression. Due to the use of avid MHC-I tetramers, binding to TAPBPR  
99 was found to be highly dependent on surface expression levels. To control for this, yeast were  
100 gated (magenta box) for low TAPBPR expression to minimize avidity effects and control for any  
101 differences in expression among TAPBPR mutants. Bound MHC-I (based on mean APC  
102 fluorescence) was measured within the magenta gate. **(i, j)** Validation by targeted mutagenesis of  
103 TAPBPR mutants predicted from the deep mutational scans to have reduced (orange) or increased  
104 (blue) binding to H2-D<sup>d</sup> (I; 1.0 µg/ml, mean ± SD from n = 4 independent experiments) or HLA-  
105 A\*02:01 (J; 2.0 µg/ml, mean ± range from n = 2 independent experiments). TAPBPR ΔALAS  
106 (grey) has slightly reduced MHC-I binding. Mean fluorescence for MHC-I binding is normalized  
107 to wild type TAPBPR (grey). **(k, l)** Binding of H2-D<sup>d</sup> (K; 2.0 µg/ml, mean ± SD from n = 4  
108 independent experiments) or HLA-A\*02:01 (L; 2.0 µg/ml, mean ± range from n = 2 independent  
109 experiments) to TAPBPR-expressing yeast is competed by peptides. Shown are data from yeast  
110 expressing wild type TAPBPR, TAPBPR ΔALAS, and representative mutants. gP18-I10 is a low  
111 affinity peptide for H2-D<sup>d</sup> missing an N-terminal anchoring residue for the A pocket. Peptide  
112 sequences are: RGPGRAFVTI (P18-I10), GPGRAFVTI (gP18-I10), AGPARAAAL (motif),  
113 LLFGYPVYV (HTLV-1 TAX9), ELAGIGILTV (MART1), NLVPMVATV (CMVpp65).  
114

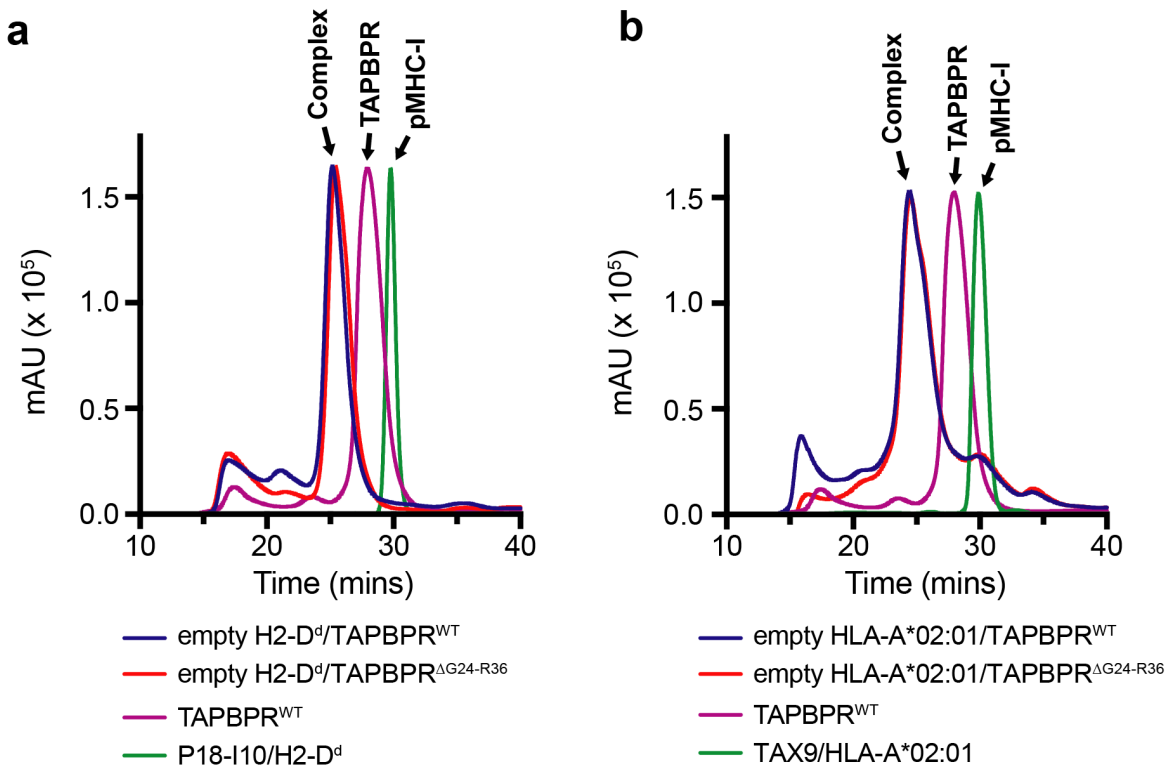

115  
 116 **Supplementary Fig. 4. Purification of peptide-deficient MHC-I/TAPBPR complexes.**  
 117 Size exclusion chromatographs of peptide-deficient MHC-I/TAPBPR complexes, relative to the  
 118 free pMHC-I and TAPBPR species. photoP18-I10/H2-D<sup>d</sup>/hβ<sub>2</sub>m (a) or photoFluM1/HLA-  
 119 A\*02:01/hβ<sub>2</sub>m (b) were mixed with TAPBPR at 1:1 molar ratio and incubated for 1 hour at 25°C.  
 120 The mixture was then UV-irradiated at 365 nm for 1 hour followed by centrifugation at 13,000  
 121 r.p.m. for 10 min to remove precipitates. Pure 1:1 stoichiometric H2-D<sup>d</sup>/hβ<sub>2</sub>m/TAPBPR (a) or  
 122 HLA-A\*02:01/hβ<sub>2</sub>m/TAPBPR (b) complexes were isolated by SEC with a Superdex 200 Increase  
 123 10/300 GL column at flow rate of 0.5 mL/min in 50 mM NaCl, 20 mM sodium phosphate pH 7.2.  
 124 The exact procedure was followed for complexes containing either TAPBPR<sup>WT</sup> or TAPBPR<sup>ΔG24-  
 125 R36</sup>, with chromatograms shown as different colors. Validation of peptide removal from the peaks  
 126 at approx. 26 min corresponding to the MHC-I/TAPBPR complexes was achieved using liquid  
 127 chromatography-mass spectroscopy (LC-MS) and carried out with passage through a Higgins  
 128 PROTO300 C4 column (5 μm, 100 mm × 2.1 mm) followed by electron ion spray mass  
 129 spectroscopy performed on a Thermo Finnigan LC-MS/MS (LTQ).  
 130

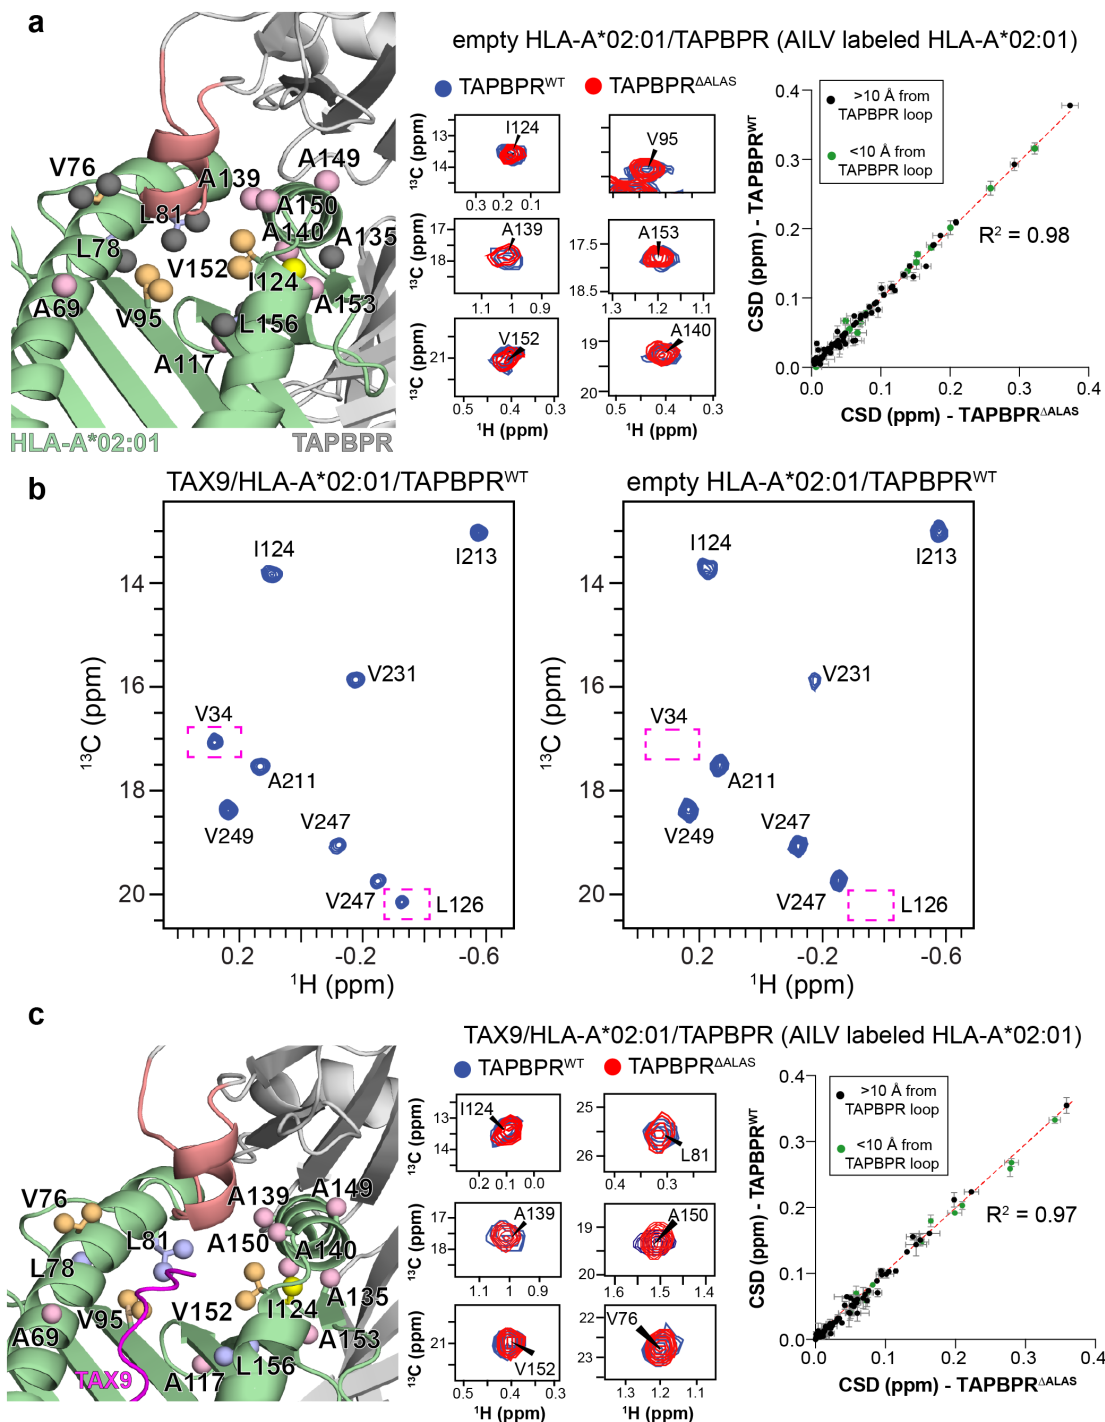

131  
 132 **Supplementary Fig. 5. The TAPBPR G24-R36 loop does not form a stable interaction with**  
 133 **the HLA-A\*02:01 groove. (a)** (Left) View of the peptide-deficient HLA-A\*02:01/TAPBPR  
 134 model (template PDB ID 5OPI) showing AILV methyl probes on HLA-A\*02:01 (as spheres)  
 135 within 10 Å angstroms of the TAPBPR G24-R36 loop (salmon). Methyl resonances of HLA-  
 136 A\*02:01 residues shown in black are missing in 2D <sup>1</sup>H-<sup>13</sup>C methyl HMQC spectra of peptide-  
 137 deficient HLA-A\*02:01/h $\beta$ <sub>2</sub>m/TAPBPR complex due to conformational exchange induced line  
 138 broadening. (Middle) Zoom in of representative peaks from 2D <sup>1</sup>H-<sup>13</sup>C methyl HMQC spectra of  
 139 80 μM peptide-deficient HLA-A\*02:01 (AILV labeled)/h $\beta$ <sub>2</sub>m in complex with TAPBPR<sup>WT</sup> (red)



140 and TAPBPR<sup>ΔALAS</sup> (blue) recorded at 25°C at a <sup>1</sup>H field of 800 MHz. (Right) Comparison of  
141 chemical shift deviation (CSD) values measured between free TAX9/HLA-A\*02:01/hβ<sub>2</sub>m and  
142 peptide-deficient HLA-A\*02:01/hβ<sub>2</sub>m in complex with TAPBPR<sup>WT</sup> or TAPBPR<sup>ΔALAS</sup>. CSD  
143 values for HLA-A\*02:01 methyl probes within 10 Å of the TAPBPR G24-R36 loop are shown in  
144 green, while those further than 10 Å are shown in black. The dotted red line is a linear fit of the  
145 data with R<sup>2</sup> value noted. **(b)** Comparison of 2D <sup>1</sup>H-<sup>13</sup>C HMQC spectra of 80 μM TAX9/HLA-  
146 A\*02:01 (AILV labeled)/hβ<sub>2</sub>m/TAPBPR<sup>WT</sup> in the presence of 200 μM excess TAPBPR<sup>WT</sup> (left)  
147 with 80 μM peptide-deficient HLA-A\*02:01 (AILV labeled)/hβ<sub>2</sub>m/TAPBPR<sup>WT</sup> (right). Dotted  
148 pink boxes highlight methyl resonances that become exchange broadened in the wild-type empty  
149 HLA-A\*02:01/TAPBPR complex but are present in the wild-type TAX9/HLA-A\*02:01/ complex.  
150 **(c)** (Left) View of the TAX9/HLA-A\*02:01/TAPBPR model (template PDB ID 5OPI) showing  
151 AILV methyl probes on HLA-A\*02:01 (as spheres) within 10 Å angstroms of the TAPBPR G24-  
152 R36 loop (salmon). (Middle) Zoom in of representative peaks from 2D <sup>1</sup>H-<sup>13</sup>C methyl HMQC  
153 spectra of 80 μM TAX9/HLA-A\*02:01 (AILV labeled)/hβ<sub>2</sub>m in complex with TAPBPR<sup>WT</sup> (red)  
154 and TAPBPR<sup>ΔALAS</sup> (blue) recorded at 25°C at a <sup>1</sup>H field of 800 MHz. (Right) Comparison of  
155 chemical shift deviation (CSD) values measured between free TAX9/HLA-A\*02:01/hβ<sub>2</sub>m and  
156 TAX9/HLA-A\*02:01/hβ<sub>2</sub>m in complex with TAPBPR<sup>WT</sup> or TAPBPR<sup>ΔALAS</sup>. CSD values for HLA-  
157 A\*02:01 methyl probes within 10 Å of the TAPBPR G24-R36 loop are shown in green, while  
158 those further than 10 Å are shown in black. The dotted red line is a linear fit of the data with R<sup>2</sup>  
159 value noted. Scatter plot data points presented in panels **(a)** and **(c)** are the mean ± SD for n = 3  
160 independent experimental replicates.

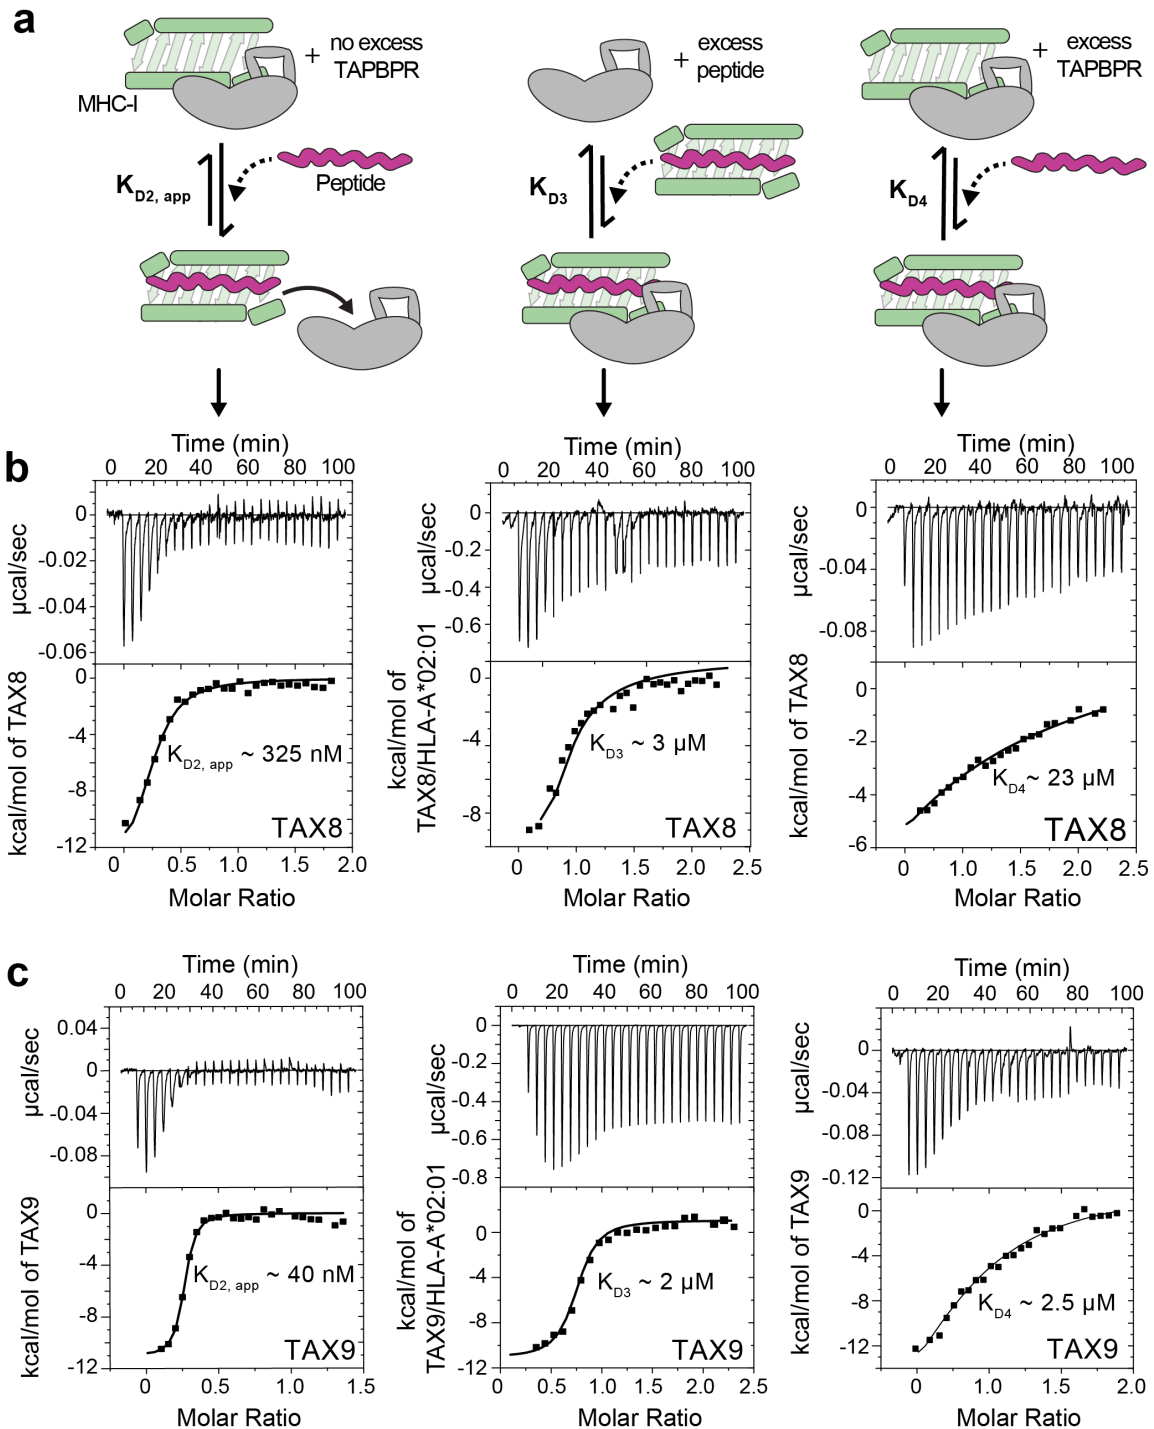

161  
 162 **Supplementary Fig. 6. Design of ITC experiments to examine specific steps of the**  
 163 **thermodynamic cycle of TAPBPR mediated peptide exchange. (a)** Schematic of conditions in  
 164 the calorimetry cell (top) and the syringe (titration represented by the dotted arrow) during ITC  
 165 experiments for each step of the peptide exchange cycle. Due to experimental limitations, the  
 166 measured  $K_{D2}$  is “apparent” and thus denoted with  $K_{D2, app}$  **(b, c)** Representative examples of raw  
 167 ITC data for each step of the peptide exchange cycle for TAX8 and TAX9 peptide. The line

168 represents the best fit of the data using a 1:1 model in Origin. Fitted apparent  $K_D$  values are  
169 reported. Details of the experiments are outline in the *Materials and Methods*.

170  
171  
172  
173  
174  
175  
176  
177  
178  
179  
180  
181  
182  
183  
184  
185  
186  
187  
188  
189  
190  
191  
192  
193  
194  
195  
196  
197  
198  
199  
200  
201  
202  
203  
204  
205  
206  
207  
208  
209  
210  
211

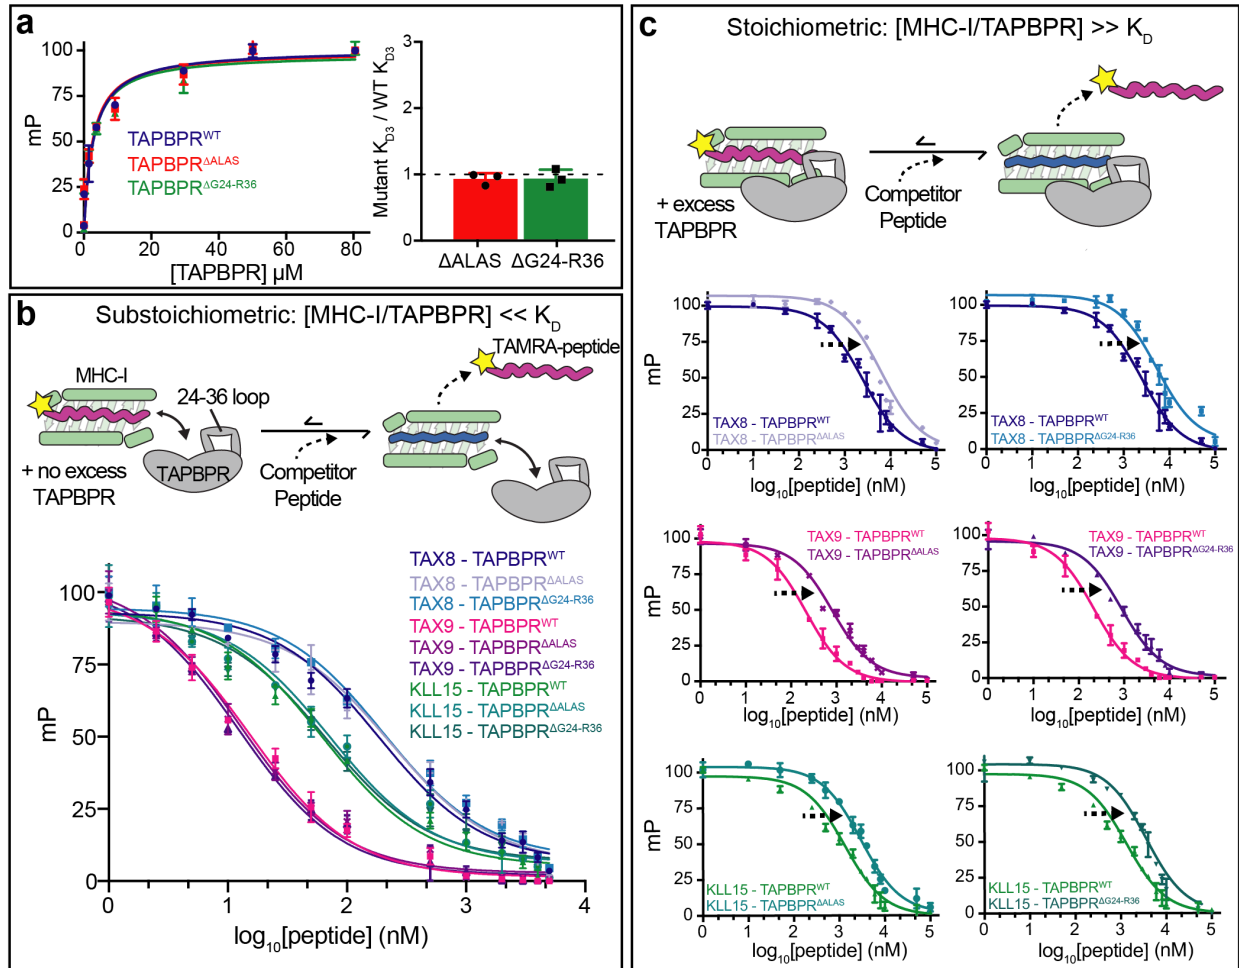

212  
 213 **Supplementary Fig. 7. Design of FP assays to examine specific steps of the thermodynamic**  
 214 **cycle of TAPBPR mediated peptide exchange.** (a) FP experiments to probe the  $K_{D3}$  step of the  
 215 peptide exchange cycle. (Left) Titration of graded concentrations of TAPBPR<sup>WT</sup>, TAPBPR<sup>ΔALAS</sup>  
 216 or TAPBPR<sup>ΔG24-R36</sup> into 1 nM TAMRA-TAX9 and 50 nM TAX8/HLA-A\*02:01/hβ<sub>2</sub>m. (Right)  
 217 Ratio of FP-determined  $K_{D3}$  values for mutant / wild-type TAPBPR. (b) Schematic of the design  
 218 of FP experiments performed under substoichiometric conditions (no excess TAPBPR). Under  
 219 substoichiometric conditions, 50 nM of wild-type or G24-R36 loop peptide-deficient HLA-  
 220 A\*02:01/hβ<sub>2</sub>m/TAPBPR complex is incubated with 1 nM TAMRA-TAX9 peptide and a range of  
 221 concentrations of competitor peptide. millipolarization (mP) values are plotted as a function of the  
 222 log<sub>10</sub> peptide concentration for TAX8, TAX9 and KLL15 peptides. (c) Schematic of the design of  
 223 FP experiments performed under stoichiometric conditions (excess TAPBPR). Under  
 224 stoichiometric conditions, 50 nM of wild-type or G24-R36 loop mutant peptide-deficient HLA-  
 225 A\*02:01/hβ<sub>2</sub>m/TAPBPR complex is incubated with 1 nM TAMRA-TAX9 peptide, 2 μM  
 226 TAPBPR (or TAPBPR<sup>ΔALAS</sup> or TAPBPR<sup>ΔG24-R36</sup>) and a range of concentrations of competitor  
 227 peptide. mP values are plotted as a function of the log<sub>10</sub> peptide concentration for TAX8, TAX9  
 228 and KLL15 peptides. Data presented in panels (a), (b) and (c) are mean ± SD for n = 3 independent  
 229 experimental replicates.  
 230

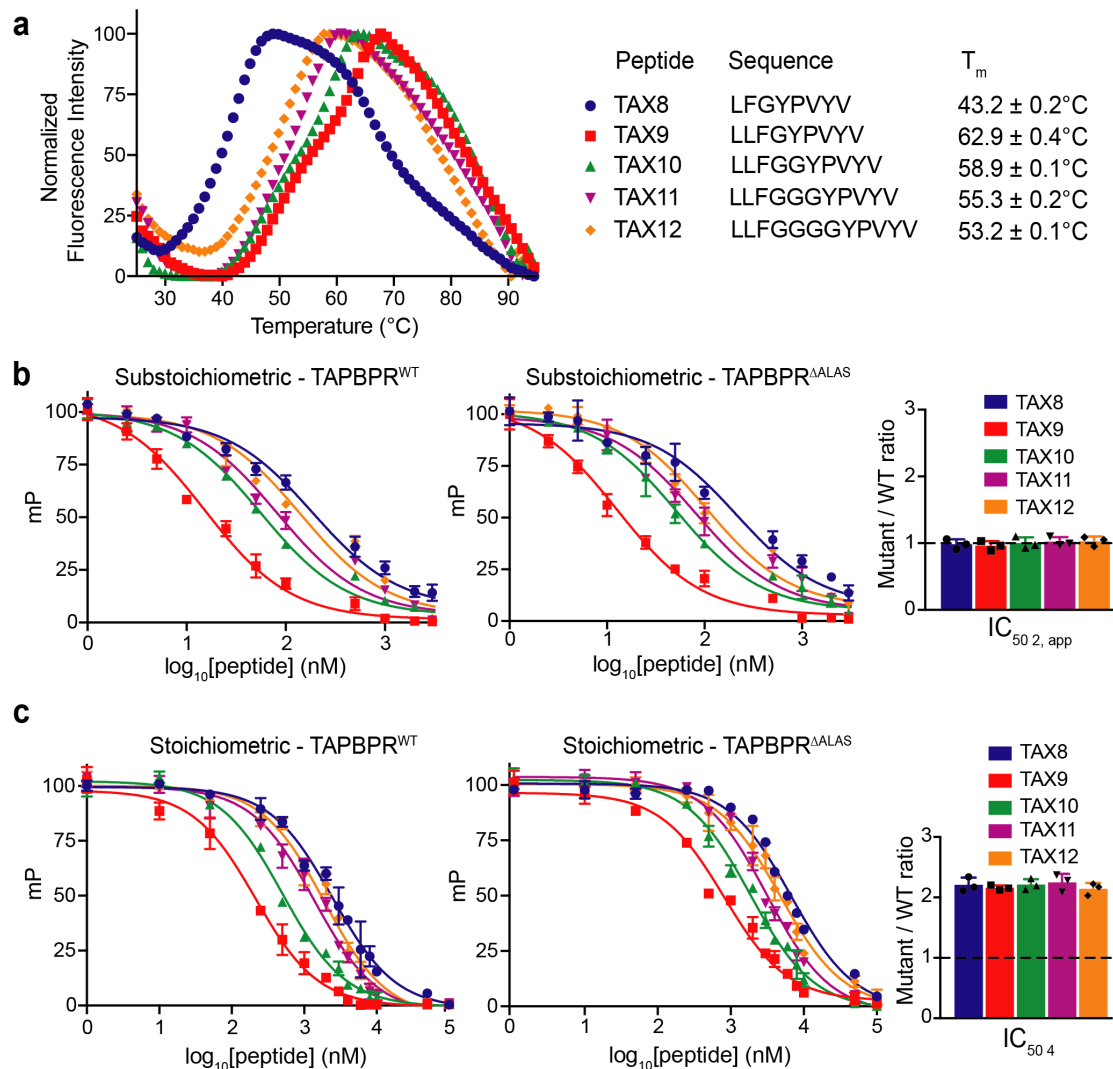

231  
 232 **Supplementary Fig. 8. Evaluation of peptide length dependence for TAPBPR mediated**  
 233 **exchange.** (a) DSF experiments performed on 7  $\mu\text{M}$  HLA-A\*02:01/h $\beta_2\text{m}$  in complex with  
 234 different TAX length variants. The peptide sequence and determined  $T_m$  values are shown.  
 235 Fluorescence intensities were normalized for comparison. Data presented is the mean  $\pm$  SD for  $n$   
 236 = 3 technical replicates. (b) (Left, Middle) FP performed under substoichiometric conditions, 50  
 237 nM of peptide-deficient HLA-A\*02:01/h $\beta_2\text{m}$ /TAPBPR<sup>WT</sup> or HLA-A\*02:01/h $\beta_2\text{m}$ /TAPBPR<sup>ΔALAS</sup>  
 238 complex is incubated with 1 nM TAMRA-TAX9 peptide and a range of concentrations of  
 239 competitor peptide. millipolarization (mP) values are plotted as a function of the log<sub>10</sub> peptide  
 240 concentration for the TAX length variant peptides. (Right) Comparison of the ratio of FP  
 241 determined IC<sub>50, app</sub> values for TAPBPR<sup>ΔALAS</sup> versus TAPBPR<sup>WT</sup>. The dotted line represents no  
 242 effect. (c) (Left, Middle) FP performed under stoichiometric conditions, 50 nM of peptide-  
 243 deficient HLA-A\*02:01/h $\beta_2\text{m}$ /TAPBPR<sup>WT</sup> or HLA-A\*02:01/h $\beta_2\text{m}$ /TAPBPR<sup>ΔALAS</sup> complex is  
 244 incubated with 1 nM TAMRA-TAX9 peptide, 2  $\mu\text{M}$  TAPBPR (or TAPBPR<sup>ΔALAS</sup>) and a range of  
 245 concentrations of competitor peptide. mP values are plotted as a function of the log<sub>10</sub> peptide  
 246 concentration for the TAX length variant peptides. (Right) Comparison of the ratio of FP  
 247 determined IC<sub>50, 4</sub> values for TAPBPR<sup>ΔALAS</sup> versus TAPBPR<sup>WT</sup>. The dotted line represents no

248 effect. Data presented in panels **(b)** and **(c)** are mean  $\pm$  SD for n = 3 independent experimental  
249 replicates.  
250

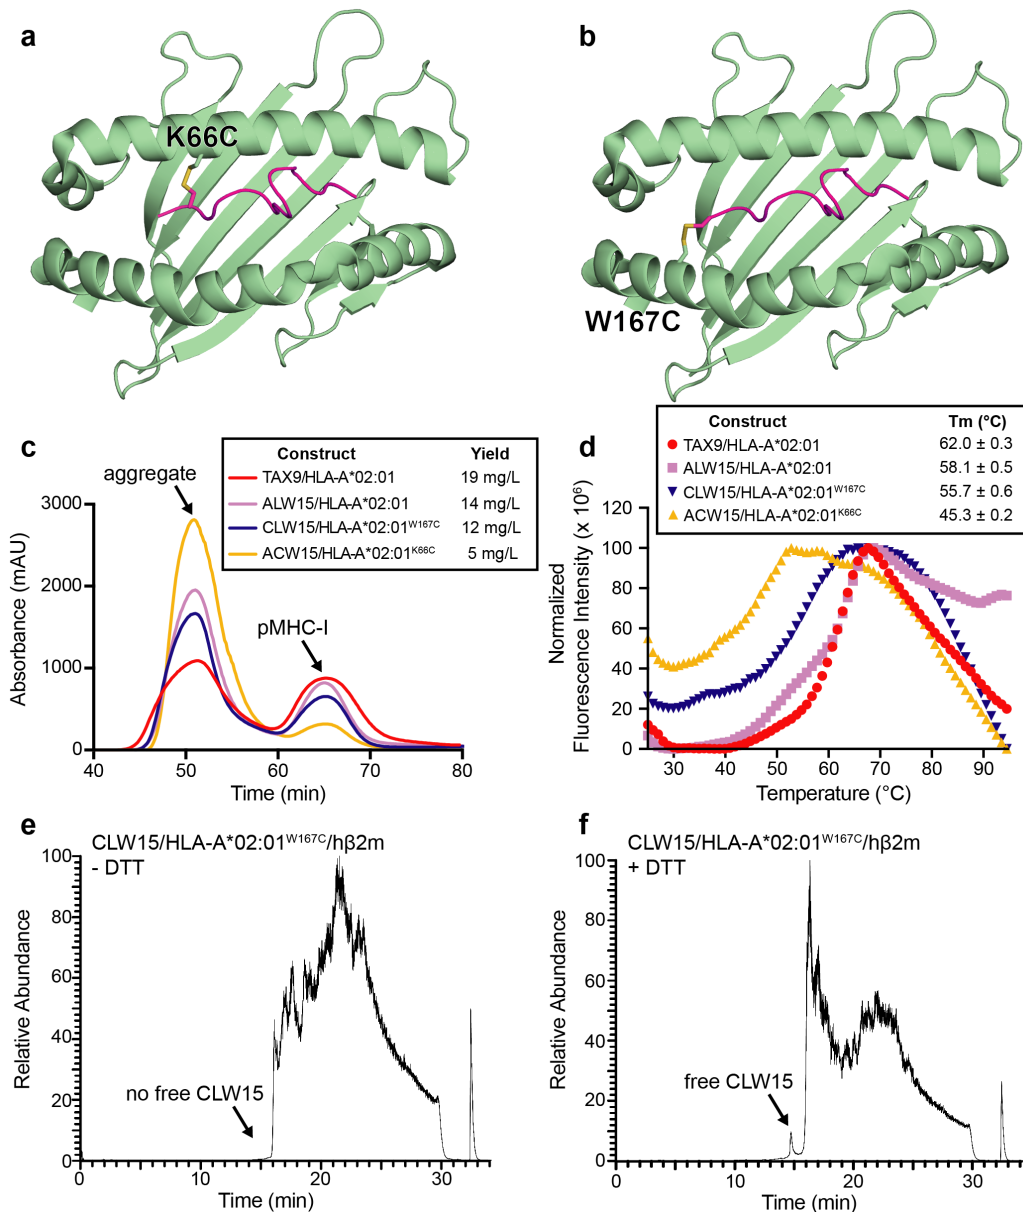

251  
252

253 **Supplementary Fig. 9. Design of disulfide mutants linking peptide to the MHC-I groove.**

254 Structural models of disulfides between ALW15 peptide (ALWDIETGQQKTFFV) and the HLA-  
 255 A\*02:01 groove based on Disulfide by Design v2. **(a)** Predicted disulfide between L2C of ALW15  
 256 (herein called ACW15) and K66C of HLA-A\*02:01. **(b)** Predicted disulfide between A1C of  
 257 ALW15 (herein called CLW15) and W167C of HLA-A\*02:01. **(c)** Purification of *in vitro* refolded  
 258 pMHC-I constructs by size exclusion chromatography. TAX9 is a high affinity peptide reference.  
 259 ALW15 is the reference for the wild-type 15mer peptide. ACW15 and CLW15 peptides are the  
 260 disulfide mutant designs shown in A. and B., respectively. The final refolded protein yield after  
 261 purification is noted. **(d)** Differential scanning fluorimetry of purified pMHC-I constructs. The  
 262 fitted melting temperature (T<sub>m</sub>) is noted. Data presented is the mean ± SD for n = 3 technical  
 263 replicates. **(e, f)** LC-MS of CLW15/HLA-A\*02:01/hβ2m without and with 1 mM DTT.

264

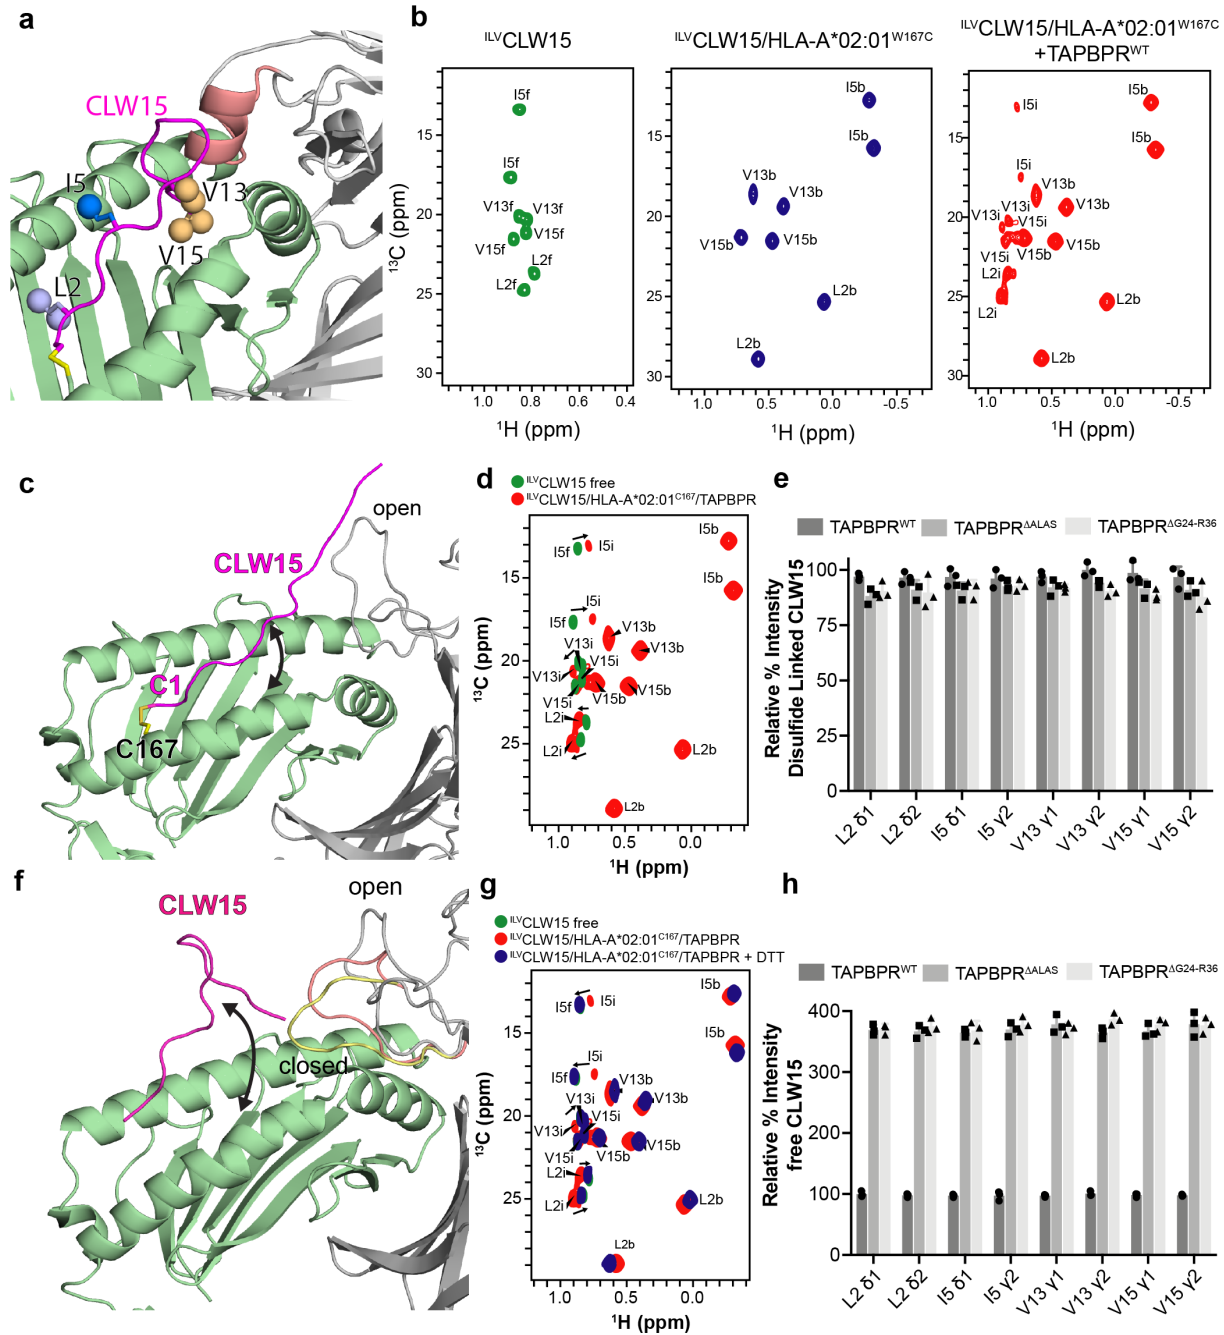

265  
 266  
 267  
 268  
 269  
 270  
 271  
 272  
 273  
 274  
 275

**Supplementary Fig. 10. NMR characterization of chaperone mediated peptide exchange on MHC-I for a 15mer peptide.** (a) Model of the CLW15/HLA-A\*02:01/TAPBPR complex designed using Disulfide by Design v2 and RosettaCM. The disulfide is formed between C1 of CLW15 (CLWDIETGQKTVFV) and W167C of HLA-A\*02:01. The TAPBPR G24-R36 loop conformation (salmon) is from PDB ID 5OPI. ILV methyl residues of CLW15 are shown as spheres. CLW15 peptide is magenta, HLA-A\*02:01 groove is green and TAPBPR is grey. (b) 2D  $^1\text{H}$ - $^{13}\text{C}$  methyl HMQC spectra of  $100\ \mu\text{M}$   $^{15}\text{N}/^{13}\text{C}$  ILV labeled CLW15 in the free state (green), in complex with HLA-A\*02:01 (blue) and in complex with HLA-A\*02:01 in the presence of 8-fold excess TAPBPR (red) recorded at  $25\ ^\circ\text{C}$  at a  $^1\text{H}$  field of 800 MHz. Methyl resonances in the pMHC-I state are denoted “b” for bound. Methyl resonances in the pMHC-I/TAPBPR state are



276 denoted “i” for intermediate. Methyl resonances for free CLW15 are denoted “f” for free. **(c)**  
277 Model of the CLW15/HLA-A\*02:01/TAPBPR complex where CLW15 samples an extended  
278 conformation and the TAPBPR G24-R36 loop samples an open conformation. The modeled  
279 protein conformations were obtained from MD simulations. **(d)** Overlay of 2D <sup>1</sup>H-<sup>13</sup>C methyl  
280 HMQC spectra of 100 μM <sup>15</sup>N/<sup>13</sup>C ILV labeled CLW15 in the free state (green) and in complex  
281 with HLA-A\*02:01 in the presence of 8-fold excess TAPBPR (red) recorded at 25 °C at a <sup>1</sup>H field  
282 of 800 MHz. Methyl resonances in the pMHC-I state are denoted as in panel **(b)**. **(e)** Comparison  
283 of NMR signal intensity for each methyl resonance of disulfide linked CLW15 intermediate in the  
284 pMHC-I/TAPBPR state with and without the TAPBPR G24-R36 loop. Data presented are mean ±  
285 SD for n = 3 independent experimental replicates. **(f)** Model of the CLW15/HLA-  
286 A\*02:01/TAPBPR complex is shown when the disulfide between CLW15 and HLA-A\*02:01 is  
287 reduced with DTT. The open and closed conformations of the TAPBPR G24-R36 loop obtained  
288 from MD simulations are shown in grey, salmon and yellow. **(g)** 2D <sup>1</sup>H-<sup>13</sup>C methyl HMQC spectra  
289 of 100 μM <sup>15</sup>N/<sup>13</sup>C ILV labeled CLW15 in the free state (green), in complex with HLA-A\*02:01  
290 in the presence of 8-fold excess TAPBPR (red) and in complex with HLA-A\*02:01 in the presence  
291 of 8-fold excess TAPBPR and 1 mM DTT (blue) recorded at 25 °C at a <sup>1</sup>H field of 800 MHz.  
292 Methyl resonances in the pMHC-I state are denoted as in panel **(b)**. **(h)** Comparison of NMR signal  
293 intensity for each methyl resonance of free CLW15 peptide when released from the MHC-  
294 I/TAPBPR complex with and without the TAPBPR G24-R36 loop. Data presented are mean ± SD  
295 for n = 3 independent experimental replicates.

296  
297  
298  
299  
300  
301  
302  
303  
304  
305  
306  
307  
308  
309  
310  
311  
312  
313  
314  
315  
316  
317  
318  
319  
320  
321

322  
323  
324

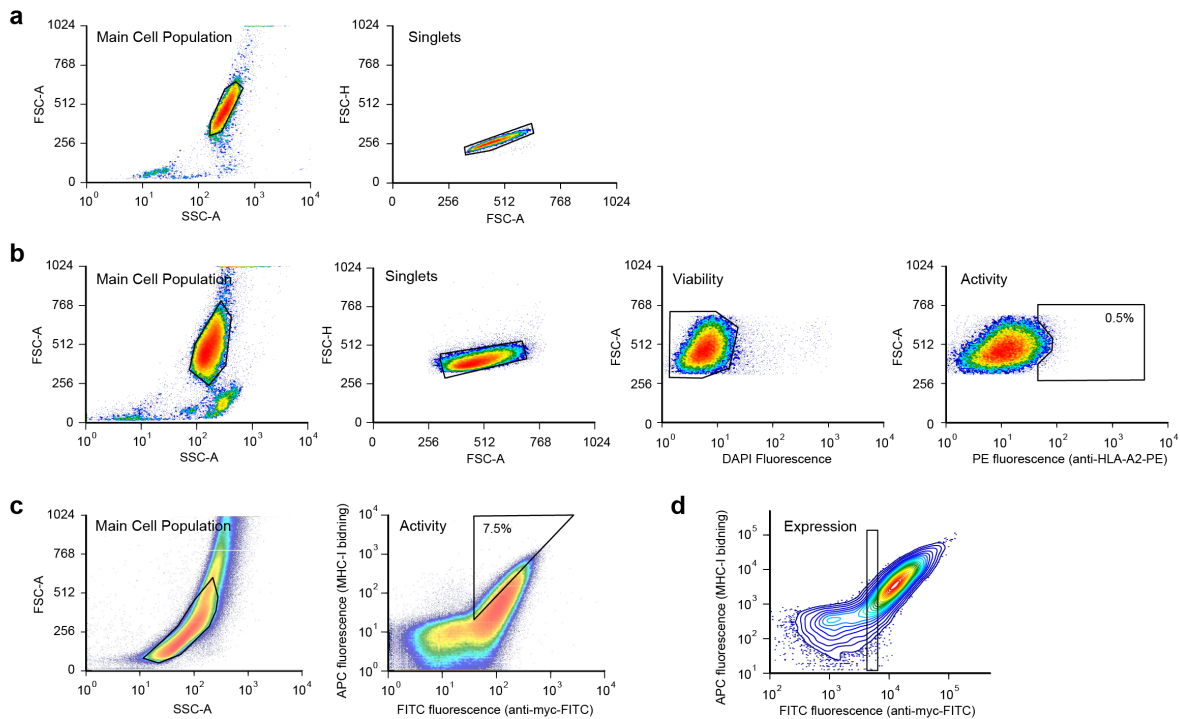

325  
326 **Supplementary Fig. 11. Gating strategies for flow cytometry experiments.** In all cases, a series  
327 of sequential gates, shown as black polygons in the plots from left to right, were drawn to include  
328 events meeting the criteria. **(a)** For analysis of transduced Expi239F cells described in Fig. 2a, 2d,  
329 and 2h, cells were first gated by FSC-A/SSC-A for the main population. Cells were then gated by  
330 FSC-A/FSC-H to remove doublets. **(b)** For FACS selections of tapasin or TAPBPR transfected  
331 Expi293F cells (used for the deep mutational scans presented in Fig. 2b-c, 2e-g, and  
332 Supplementary Fig. 2), cells were gated for the main population based on FSC-A/SSC-A, followed  
333 by gating on FSC-A/FSC-H to exclude doublets. DAPI-negative events were gated to exclude  
334 DAPI-positive dead cells. The cells with the highest surface HLA-A2 expression (top 0.5%) were  
335 then collected by gating on FSC-A versus PE fluorescence. **(c)** For deep mutagenesis of TAPBPR  
336 using yeast surface display (mutational data shown in Fig. 3 and Supplementary Fig. 3b-g), yeast  
337 were gated for the main population by FSC-A/SSC-A, followed by gating on the top 7.5% of cells  
338 for APC fluorescence (i.e. binding of fluorescently labeled MHC-I tetramers) with respect to FITC  
339 fluorescence (i.e. TAPBPR surface display based on epitope tag detection with anti-myc-FITC).  
340 **(d)** For analysis of MHC-I tetramer binding to yeast displaying TAPBPR (Supplementary Fig. 3h-  
341 l), events were first gated by FSC-A/SSC-A (left plot in panel c) and then gated by FITC  
342 fluorescence for a low level of TAPBPR expression that was consistent across all samples.

343  
344  
345  
346  
347  
348

**Supplementary Table 1. Nucleotide sequence of codon-optimized human tapasin with an extracellular FLAG epitope tag (insert in Addgene Plasmid # 141308)**

ATGGCCGTCATGGCGCCCCGAACCCTCGTCCTGCTACTCTCGGGGGCCCTGGCCCT  
 GACCCAGACCTGGGCGGGCTCCGACTACAAGGACGATGATGACAAGGGAGGATC  
 CGGCCCTGCCGTAATCGAGTGTGGTTTGTGTTGAAGACGCTAGTGGTAAAGGGCTG  
 GCTAAACGGCCAGGCGCACTTCTGTTGCGGCAAGGTCCGGGAGAACCACCTCCAC  
 GACCCGACTTGGACCCTGAATTGTACCTCTCTGTACACGACCCAGCTGGAGCACTC  
 CAAGCTGCTTTCCGACGGTACCCAAGAGGTGCTCCAGCACCGCATTGCGAGATGA  
 GTCGGTTCGTTCCCTTTGCCTGCGAGTGCAAAGTGGGCATCAGGTCTGACACCAGCA  
 CAAAAGTGTCCACGAGCGCTTGATGGAGCGTGGCTGATGGTTTCCATAAGCTCTCC  
 GGTGCTTTCCTGTCATCACTGCTCAGGCCACAACCTGAACCCCAACAAGAACCC  
 GACTGATAACAATGGCGACGGTAGTCCTTACGGTCCCTTACGCATACACCAGCAC  
 CCAGGGTGGCATTGGGACAAGACGCACTCCTCGACCTTAGCTTTGCGTACATGCC  
 ACCAACCTCAGAGGCGGCTTCCTCTCTTGCACCAGGACCACCACCGTTCGGCCTTG  
 AATGGAGACGACAGCACTTGGGGAAGGGCCATTTGCTGTTGGCTGCTACCCAGG  
 GCTGAACGGGCAGATGCCGGCAGCACAAGAGGGAGCCGTAGCTTTTGCTGCGTGG  
 GATGATGACGAACCATGGGGACCATGGACTGGAACGGGACTTTCTGGCTGCCAA  
 CAGTACAGCCCTTTCAAGAAGGAACGTATCTGGCCACCATCCATTTGCCTTATCTG  
 CAAGGCCAGGTCACACTTGAACCTCGCTGTCTATAAACCGCCTAAGGTGAGTCTCA  
 TGCCCGCAACTTTGGCTAGGGCAGCACCTGGCGAAGCTCCACCTGAATTGCTCTGT  
 TTGGTATCCCATTTCTACCCCAGTGGTGGCCTTGAAGTGAATGGGAACTTAGAGG  
 AGGACCAGGTGGTCGATCTCAGAAAGCTGAAGGGCAGCGATGGCTCTCCGCTCTC  
 AGGCACTCAGACGGATCTGTATCACTGTCAGGGCATTTCAGCCACCGCCAG  
 TTACCACCGAGCAGCATGGAGCTCGGTATGCGTGTGCGATTACCACCCTAGCCTT  
 CCGGCGTCAGGAAGATCAGCGGAGGTAACACTTGAGGTCGCTGGGTTGTCCGGAC  
 CCAGCTTGGAGGACAGTGTGGTCTGTTCCCTGTCCGCTTTCCTGTTGCTGGGTCTGT  
 TTAAGGCACTCGGATGGGCAGCAGTTTATCTCAGCACCTGTAAAGACAGCAAGAA  
 AAAGGCAGAATAG

**Supplementary Table 2. Sequences of primers used in this study.**

| Primer Name | Sequence                                                               |
|-------------|------------------------------------------------------------------------|
| TAPBPR 101  | TGC TGA CTG CAG TGG GAA GNN KGT GAC CTG TGA GAT CTC CCG                |
| TAPBPR 103  | TGC AGT GGG AAG GAG GTG NNK TGT GAG ATC TCC CGC TAC T                  |
| TAPBPR 105  | TGG GAA GGA GGT GAC CTG TNN KAT CTC CCG CTA CTT TCT CCA                |
| TAPBPR 107  | AAG GAG GTG ACC TGT GAG ATC TCC NNK CGC TAC TTT CTC CAG ATG ACA GAG AC |
| TAPBPR 108  | GAG GTG ACC TGT GAG ATC TCC NNK TAC TTT CTC CAG ATG ACA GAG AC         |
| TAPBPR 109  | GAC CTG TGA GAT CTC CCG CNN KTT TCT CCA GAT GAC AGA GAC CA             |
| TAPBPR 110  | CCT GTG AGA TCT CCC GCT ACN NKC TCC AGA TGA CAG AGA CCA C              |
| TAPBPR 111  | CTG TGA GAT CTC CCG CTA CTT TNN KCA GAT GAC AGA GAC CAC TGT T          |
| TAPBPR 112  | TGA GAT CTC CCG CTA CTT TCT CNN KAT GAC AGA GAC CAC TGT TAA GAC        |
| TAPBPR 115  | CCG CTA CTT TCT CCA GAT GAC ANN KAC CAC TGT TAA GAC AGC AGC            |
| TAPBPR 125  | TGT TAA GAC AGC AGC TTG GTT CNN KGC CAA CGT GCA GGT CT                 |
| TAPBPR 126  | AGA CAG CAG CTT GGT TCA TGN NKA ACG TGC AGG TCT CTG GA                 |
| TAPBPR 127  | AGC AGC TTG GTT CAT GGC CNN KGT GCA GGT CTC TGG AGG G                  |
| TAPBPR 128  | AGC TTG GTT CAT GGC CAA CNN KCA GGT CTC TGG AGG GGG                    |
| TAPBPR 129  | TTG GTT CAT GGC CAA CGT GNN KGT CTC TGG AGG GGG ACC                    |
| TAPBPR 130  | TTC ATG GCC AAC GTG CAG NNK TCT GGA GGG GGA CCT AGC                    |
| TAPBPR 131  | ATG GCC AAC GTG CAG GTC NNK GGA GGG GGA CCT AGC ATC                    |
| TAPBPR 136  | GTC TCT GGA GGG GGA CCT NNK ATC TCC TTG GTG ATG AAG ACT C              |
| TAPBPR 137  | TCT GGA GGG GGA CCT AGC NNK TCC TTG GTG ATG AAG ACT CCC                |
| TAPBPR 138  | TGG AGG GGG ACC TAG CAT CNN KTT GGT GAT GAA GAC TCC CAG G              |
| TAPBPR 180  | TCC AGG TGA TGA CAC AGA CCN NKT CCC TGA GCT TCC TGC T                  |
| TAPBPR 181  | AGG TGA TGA CAC AGA CCC AAN NKC TGA GCT TCC TGC TGG G                  |
| TAPBPR 186  | CCC AAT CCC TGA GCT TCC TGN NKG GGT CCT CAG CCT CCT T                  |
| TAPBPR 210  | ACC TCA TCA GTG TGG AGT GGN NKC TGC AGC ACA AGG GCA                    |
| TAPBPR 212  | AGT GTG GAG TGG CGA CTG NNK CAC AAG GGC AGG GGT CA                     |
| TAPBPR 213  | GTG GAG TGG CGA CTG CAG NNK AAG GGC AGG GGT CAG TT                     |
| TAPBPR 214  | GAG TGG CGA CTG CAG CAC NNK GGC AGG GGT CAG TTG GT                     |
| TAPBPR 215  | TGG CGA CTG CAG CAC AAG NNK AGG GGT CAG TTG GTG TAC A                  |
| TAPBPR 216  | CGA CTG CAG CAC AAG GGC NNK GGT CAG TTG GTG TAC AGC T                  |
| TAPBPR 217  | CTG CAG CAG AAG GGC AGG NNK CAG TTG GTG TAC AGC TGG A                  |
| TAPBPR 257  | ACC CTG CCC GGC CTC ACT NNK CAG GAC GAG GGG ACC TAC                    |
| TAPBPR 262  | CTC ACT ATA CAG GAC GAG GGG NNK TAC ATT TGC CAG ATC ACC ACC            |
| TAPBPR 263  | TAT ACA GGA CGA GGG GAC CNN KAT TTG CCA GAT CAC CAC CTC                |
| TAPBPR 264  | ACA GGA CGA GGG GAC CTA CNN KTG CCA GAT CAC CAC CTC T                  |
| TAPBPR 266  | ACG AGG GGA CCT ACA TTT GCN NKA TCA CCA CCT CTC TGT ACC G              |
| TAPBPR 273  | CCA GAT CAC CAC CTC TCT GTA CNN KGC TCA GCA GAT CAT CCA GC             |
| TAPBPR 275  | CCA CCT CTC TGT ACC GAG CTN NKC AGA TCA TCC AGC TCA ACA TCC            |
| TAPBPR 276  | ACC TCT CTG TAC CGA GCT CAG NNK ATC ATC CAG CTC AAC ATC CAA            |
| TAPBPR 277  | TCT GTA CCG AGC TCA GCA GNN KAT CCA GCT CAA CAT CCA AGC                |
| TAPBPR 279  | ACC GAG CTC AGC AGA TCA TCN NKC TCA ACA TCC AAG CTT CCC C              |
| TAPBPR 281  | GCT CAG CAG ATC ATC CAG CTC NNK ATC CAA GCT TCC CCT AAA GTA C          |
| TAPBPR 284  | GAT CAT CCA GCT CAA CAT CCA ANN KTC CCC TAA AGT ACG ACT GAG C          |
| TAPBPR 306  | CCA CCC TCA TCT GCG ACA TTN NKG GCT ATT ACC CTC TGG ATG TG             |
| TAPBPR 309  | CTG CGA CAT TGC TGG CTA TNN KCC TCT GGA TGT GGT GGT G                  |
| TAPBPR 310  | TGC GAC ATT GCT GGC TAT TAC NNK CTG GAT GTG GTG GTG ACG                |
| TAPBPR 311  | CGA CAT TGC TGG CTA TTA CCC TNN KGA TGT GGT GGT GAC GTG G              |
| TAPBPR 312  | ATT GCT GGC TAT TAC CCT CTG NNK GTG GTG GTG ACG TGG AC                 |
| TAPBPR 313  | TGC TGG CTA TTA CCC TCT GGA TNN KGT GGT GAC GTG GAC CC                 |
| TAPBPR 314  | TGG CTA TTA CCC TCT GGA TGT GNN KGT GAC GTG GAC CCG AGA                |
| TAPBPR 315  | GCT ATT ACC CTC TGG ATG TGG TGN NKA CGT GGA CCC GAG AGG                |
| TAPBPR 316  | CCC TCT GGA TGT GGT GGT GNN KTG GAC CCG AGA GGA GC                     |
| TAPBPR 328  | CTG GGT GGA TCC CCA GCC NNK GTC TCT GGT GCC TCC TTC T                  |
| TAPBPR 329  | GGT GGA TCC CCA GCC CAA NNK TCT GGT GCC TCC TTC TCC                    |
| TAPBPR 330  | TGG ATC CCC AGC CCA AGT CNN KGG TGC CTC CTT CTC CAG C                  |
| TAPBPR 331  | TCC CCA GCC CAA GTC TCT NNK GCC TCC TTC TCC AGC CT                     |
| TAPBPR 332  | CCC AGC CCA AGT CTC TGG TNN KTC CTT CTC CAG CCT CAG G                  |
| TAPBPR 333  | GCC CAA GTC TCT GGT GCC NNK TTC TCC AGC CTC AGG CA                     |
| TAPBPR 334  | CCA AGT CTC TGG TGC CTC CNN KTC CAG CCT CAG GCA AAG C                  |
| TAPBPR 335  | AAG TCT CTG GTG CCT CCT TCN NKA GCC TCA GGC AAA GCG                    |
| TAPBPR 336  | CTC TGG TGC CTC CTT CTC CNN KCT CAG GCA AAG CGT GGC                    |
| TAPBPR 337  | GGT GCC TCC TTC TCC AGC NNK AGG CAA AGC GTG GCA G                      |
| TAPBPR 338  | TGC CTC CTT CTC CAG CCT CNN KCA AAG CGT GGC AGG CA                     |
| TAPBPR 339  | CTC CTT CTC CAG CCT CAG GNN KAG CGT GGC AGG CAC C                      |
| TAPBPR 340  | TTC TCC AGC CTC AGG CAA NNK GTG GCA GGC ACC TAC AG                     |

|             |                                                             |
|-------------|-------------------------------------------------------------|
| TAPBPR 341  | TCC AGC CTC AGG CAA AGC NNK GCA GGC ACC TAC AGC AT          |
| TAPBPR 342  | AGC CTC AGG CAA AGC GTG NNK GGC ACC TAC AGC ATC TCC         |
| TAPBPR 343  | CTC AGG CAA AGC GTG GCA NNK ACC TAC AGC ATC TCC TCC TC      |
| TAPBPR 344  | AGG CAA AGC GTG GCA GGC NNK TAC AGC ATC TCC TCC CTC CT      |
| TAPBPR 345  | CAA AGC GTG GCA GGC ACC NNK AGC ATC TCC TCC TCT CTC AC      |
| TAPBPR 346  | AGC GTG GCA GGC ACC TAC NNK ATC TCC TCC TCT CTC ACC G       |
| TAPBPR 347  | GTG GCA GGC ACC TAC AGC NNK TCC TCC TCT CTC ACC GC          |
| TAPBPR 348  | GGC AGG CAC CTA CAG CAT CNN KTC CTC TCT CAC CGC AGA A       |
| TAPBPR 350  | GGC ACC TAC AGC ATC TCC TCC NNK CTC ACC GCA GAA CCT GG      |
| TAPBPR 352  | TAC AGC ATC TCC TCC TCT CTC NNK GCA GAA CCT GGC TCT GC      |
| TAPBPR 369  | ACC TGC CAG GTC ACA CAC NNK TCT CTG GAG GAG CCC CT          |
| TAPBPR 142  | ACC TAG CAT CTC CTT GGT GAT GNN KAC TCC CAG GGT CGC C       |
| TAPBPR 148  | AAG ACT CCC AGG GTC GCC NNK AAT GAG GTG CTC TGG CAC         |
| TAPBPR 178  | GTG GAG TTC CAG GTG ATG ACA NNK ACC CAA TCC CTG AGC TTC C   |
| TAPBPR 238  | CGG AAG GGC GCT ACC CTG NNK CCT GCA CAA CTG GGC A           |
| TAPBPR 244  | GAG CCT GCA CAA CTG GGC NNK GCC AGG GAT GCC TCC C           |
| TAPBPR 251  | GCC AGG GAT GCC TCC CTC NNK CTG CCC GGC CTC ACT             |
| TAPBPR 289  | ACA TCC AAG CTT CCC CTA AAG TAN NKC TGA GCT TGG CAA ACG AAG |
| TAPBPR 320  | GTG GTG ACG TGG ACC CGA NNK GAG CTG GGT GGA TCC CC          |
| TAPBPR 363  | CTC TGC AGG TGC CAC TTA CNN KTG CCA GGT CAC ACA CAT C       |
| TAPBPR 372  | CCA GGT CAC ACA CAT CTC TCT GNN KGA GCC CCT TGG GGC C       |
| TAPBPR 171  | GGG ACT GTG CGA ACT GCA NNK GAG TTC CAG GTG ATG ACA CA      |
| TAPBPR 194  | GTC CTC AGC CTC CTT GGA CNN KGG CTT CTC CAT GGC ACC         |
| TAPBPR 196  | GCC TCC TTG GAC TGT GGC NNK TCC ATG GCA CCG GGC             |
| TAPBPR 209  | TGG ACC TCA TGA GTG TGG AGN NKC GAC TGC AGC ACA AGG G       |
| TAPBPR 301  | GAA GCT CTG CTG CCC ACC NNK ATC TGC GAC ATT GCT GGC         |
| TAPBPR 364  | TGC AGG TGC CAC TTA CAC CNN KCA GGT CAC ACA CAT CTC TCT G   |
| TAPBPR 368  | TAC ACC TGC CAG GTC ACA NNK ATC TCT CTG GAG GAG CCC         |
| TAPBPR 101R | CTT CCC ACT GCA GTC AGC A                                   |
| TAPBPR 103R | CAC CTC CTT CCC ACT GCA                                     |
| TAPBPR 105R | ACA GGT CAC CTC CTT CCC A                                   |
| TAPBPR 107R | GAT CTC ACA GGT CAC CTC CTT                                 |
| TAPBPR 108R | GGA GAT CTC ACA GGT CAC CTC                                 |
| TAPBPR 109R | GCG GGA GAT CTC ACA GGT C                                   |
| TAPBPR 110R | GTA GCG GGA GAT CTC ACA GG                                  |
| TAPBPR 111R | AAA GTA GCG GGA GAT CTC ACA G                               |
| TAPBPR 112R | GAG AAA GTA GCG GGA GAT CTC A                               |
| TAPBPR 115R | TGT CAT CTG GAG AAA GTA GCG G                               |
| TAPBPR 125R | GAA CCA AGC TGC TGT CTT AAC A                               |
| TAPBPR 126R | CAT GAA CCA AGC TGC TGT CT                                  |
| TAPBPR 127R | GGC CAT GAA CCA AGC TGC T                                   |
| TAPBPR 128R | GTT GGC CAT GAA CCA AGC T                                   |
| TAPBPR 129R | CAC GTT GGC CAT GAA CCA A                                   |
| TAPBPR 130R | CTG CAC GTT GGC CAT GAA                                     |
| TAPBPR 131R | GAC CTG CAC GTT GGC CAT                                     |
| TAPBPR 136R | AGG TCC CCC TCC AGA GAC                                     |
| TAPBPR 137R | GCT AGG TCC CCC TCC AGA                                     |
| TAPBPR 138R | GAT GCT AGG TCC CCC TCC A                                   |
| TAPBPR 180R | GGT CTG TGT CAT CAC CTG GA                                  |
| TAPBPR 181R | TTG GGT CTG TGT CAT CAC CT                                  |
| TAPBPR 186R | CAG GAA GCT CAG GGA TTG GG                                  |
| TAPBPR 210R | CCA CTC CAC ACT GAT GAG GT                                  |
| TAPBPR 212R | CAG TCG CCA CTC CAC ACT                                     |
| TAPBPR 213R | CTG CAG TCG CCA CTC CAC                                     |
| TAPBPR 214R | GTG CTG CAG TCG CCA CTC                                     |
| TAPBPR 215R | CTT GTG CTG CAG TCG CCA                                     |
| TAPBPR 216R | GCC CTT GTG CTG CAG TCG                                     |
| TAPBPR 217R | CCT GCC CTT GTG CTG CAG                                     |
| TAPBPR 257R | AGT GAG GCC GGG CAG GGT                                     |
| TAPBPR 262R | CCC CTC GTC CTG TAT AGT GAG                                 |
| TAPBPR 263R | GGT CCC CTC GTC CTG TAT A                                   |
| TAPBPR 264R | GTA GGT CCC CTC GTC CTG T                                   |
| TAPBPR 266R | GCA AAT GTA GGT CCC CTC GT                                  |
| TAPBPR 273R | GTA CAG AGA GGT GGT GAT CTG G                               |
| TAPBPR 275R | AGC TCG GTA CAG AGA GGT GG                                  |
| TAPBPR 276R | CTG AGC TCG GTA CAG AGA GGT                                 |

|                 |                                                            |
|-----------------|------------------------------------------------------------|
| TAPBPR 277R     | CTG CTG AGC TCG GTA CAG A                                  |
| TAPBPR 279R     | GAT GAT CTG CTG AGC TCG GT                                 |
| TAPBPR 281R     | GAG CTG GAT GAT CTG CTG AGC                                |
| TAPBPR 284R     | TTG GAT GTT GAG CTG GAT GAT C                              |
| TAPBPR 306R     | AAT GTC GCA GAT GAG GGT GG                                 |
| TAPBPR 309R     | ATA GCC AGC AAT GTC GCA G                                  |
| TAPBPR 310R     | GTA ATA GCC AGC AAT GTC GCA                                |
| TAPBPR 311R     | AGG GTA ATA GCC AGC AAT GTC G                              |
| TAPBPR 312R     | CAG AGG GTA ATA GCC AGC AAT                                |
| TAPBPR 313R     | ATC CAG AGG GTA ATA GCC AGC A                              |
| TAPBPR 314R     | CAC ATC CAG AGG GTA ATA GCC A                              |
| TAPBPR 315R     | CAC CAC ATC CAG AGG GTA ATA GC                             |
| TAPBPR 316R     | CAC CAC CAC ATC CAG AGG G                                  |
| TAPBPR 328R     | GGC TGG GGA TCC ACC CAG                                    |
| TAPBPR 329R     | TTG GGC TGG GGA TCC ACC                                    |
| TAPBPR 330R     | GAC TTG GGC TGG GGA TCC A                                  |
| TAPBPR 331R     | AGA GAC TTG GGC TGG GGA                                    |
| TAPBPR 332R     | ACC AGA GAC TTG GGC TGG G                                  |
| TAPBPR 333R     | GGC ACC AGA GAC TTG GGC                                    |
| TAPBPR 334R     | GGA GGC ACC AGA GAC TTG G                                  |
| TAPBPR 335R     | GAA GGA GGC ACC AGA GAC TT                                 |
| TAPBPR 336R     | GGA GAA GGA GGC ACC AGA G                                  |
| TAPBPR 337R     | GCT GGA GAA GGA GGC ACC                                    |
| TAPBPR 338R     | GAG GCT GGA GAA GGA GGC A                                  |
| TAPBPR 339R     | CCT GAG GCT GGA GAA GGA G                                  |
| TAPBPR 340R     | TTG CCT GAG GCT GGA GAA                                    |
| TAPBPR 341R     | GCT TTG CCT GAG GCT GGA                                    |
| TAPBPR 342R     | CAC GCT TTG CCT GAG GCT                                    |
| TAPBPR 343R     | TGC CAC GCT TTG CCT GAG                                    |
| TAPBPR 344R     | GCC TGC CAC GCT TTG CCT                                    |
| TAPBPR 345R     | GGT GCC TGC CAC GCT TTG                                    |
| TAPBPR 346R     | GTA GGT GCC TGC CAC GCT                                    |
| TAPBPR 347R     | GCT GTA GGT GCC TGC CAC                                    |
| TAPBPR 348R     | GAT GCT GTA GGT GCC TGC C                                  |
| TAPBPR 350R     | GGA GGA GAT GCT GTA GGT GCC                                |
| TAPBPR 352R     | GAG AGA GGA GGA GAT GCT GTA                                |
| TAPBPR 369R     | GTG TGT GAC CTG GCA GGT                                    |
| TAPBPR 142R     | CAT CAC CAA GGA GAT GCT AGG T                              |
| TAPBPR 148R     | GGC GAC CCT GGG AGT CTT                                    |
| TAPBPR 178R     | TGT CAT CAC CTG GAA CTC CAC                                |
| TAPBPR 238R     | CAG GGT AGC GCC CTT CCG                                    |
| TAPBPR 244R     | GCC CAG TTG TGC AGG CTC                                    |
| TAPBPR 251R     | GAG GGA GGC ATC CCT GGC                                    |
| TAPBPR 289R     | TAC TTT AGG GGA AGC TTG GAT GT                             |
| TAPBPR 320R     | TCG GGT CCA CGT CAC CAC                                    |
| TAPBPR 363R     | GTA AGT GGC ACC TGC AGA G                                  |
| TAPBPR 372R     | CAG AGA GAT GTG TGT GAC CTG G                              |
| TAPBPR 171R     | TGC AGT TCG CAC AGT CCC                                    |
| TAPBPR 194R     | GTC CAA GGA GGC TGA GGA C                                  |
| TAPBPR 196R     | GCC ACA GTC CAA GGA GGC                                    |
| TAPBPR 209R     | CTC CAC ACT GAT GAG GTC CA                                 |
| TAPBPR 301R     | GGT GGG CAG CAG AGC TTC                                    |
| TAPBPR 364R     | GGT GTA AGT GGC ACC TGC A                                  |
| TAPBPR 368R     | TGT GAC CTG GCA GGT GTA                                    |
| tapasin isol 33 | TCG AGT GTT GGT TTG TTG AAG ACN NKA GTG GTA AAG GGC TGG CT |
| tapasin isol 34 | TGT TGG TTT GTT GAA GAC GCT NNK GGT AAA GGG CTG GCT AAA CG |
| tapasin isol 35 | TTG GTT TGT TGA AGA CGC TAG TNN KAA AGG GCT GGC TAA ACG G  |
| tapasin isol 36 | TTT GTT GAA GAC GCT AGT GGT NNK GGG CTG GCT AAA CGG C      |
| tapasin isol 37 | TTG TTG AAG ACG CTA GTG GTA AAN NKC TGG CTA AAC GGC CAG G  |
| tapasin isol 38 | GAA GAC GCT AGT GGT AAA GGG NNK GCT AAA CGG CCA GGC G      |
| tapasin isol 39 | ACG CTA GTG GTA AAG GGC TGN NKA AAC GGC CAG GCG C          |
| tapasin isol 88 | TAC CCA AGA GGT GCT CCA NNK CCG CAT TGC GAG ATG AGT        |
| tapasin isol 90 | AGA GGT GCT CCA GCA CCG NNK TGC GAG ATG AGT CGG TTC        |
| tapasin isol 92 | GCT CCA GCA CCG CAT TGC NNK ATG AGT CGG TTC GTT CCT TT     |
| tapasin isol 94 | GCA CCG CAT TGC GAG ATG NNK CCG TTC GTT CCT TTG CCT        |
| tapasin isol 95 | ACC GCA TTG CGA GAT GAG TNN KTT CGT TCC TTT GCC TGC G      |

|                  |                                                                |
|------------------|----------------------------------------------------------------|
| tapasin isol 96  | CGC ATT GCG AGA TGA GTC GGN NKG TTC CTT TGC CTG CGA GT         |
| tapasin isol 97  | TTG CGA GAT GAG TCG GTT CNN KCC TTT GCC TGC GAG TGC            |
| tapasin isol 98  | GCG AGA TGA GTC GGT TCG TTN NKT TGC CTG CGA GTG CAA            |
| tapasin isol 99  | AGA TGA GTC GGT TCG TTC CTN NKC CTG CGA GTG CAA AGT GG         |
| tapasin isol 102 | TTC GTT CCT TTG CCT GCG NNK GCA AAG TGG GCA TCA GGT            |
| tapasin isol 125 | CTT GAT GGA GCG TGG CTG NNK GTT TCC ATA AGC TCT CCG GT         |
| tapasin isol 126 | GAT GGA GCG TGG CTG ATG NNK TCC ATA AGC TCT CCG GTG C          |
| tapasin isol 127 | GGA GCG TGG CTG ATG GTT NNK ATA AGC TCT CCG GTG CTT TC         |
| tapasin isol 128 | AGC GTG GCT GAT GGT TTC CNN KAG CTC TCC GGT GCT TTC A          |
| tapasin isol 129 | GCG TGG CTG ATG GTT TCC ATA NNK TCT CCG GTG CTT TCA CTG        |
| tapasin isol 130 | TGG CTG ATG GTT TCC ATA AGC NNK CCG GTG CTT TCA CTG TCA        |
| tapasin isol 131 | GGC TGA TGG TTT CCA TAA GCT CTN NKG TGC TTT CAC TGT CAT CAC TG |
| tapasin isol 134 | CCA TAA GCT CTC CGG TGC TTN NKC TGT CAT CAC TGC TCA GGC        |
| tapasin isol 135 | AGC TCT CCG GTG CTT TCA NNK TCA TCA CTG CTC AGG CCA            |
| tapasin isol 136 | CTC TCC GGT GCT TTC ACT GNN KTC ACT GCT CAG GCC ACA            |
| tapasin isol 140 | GCT TTC ACT GTC ATC ACT GCT CNN KCC ACA ACC TGA ACC CCA A      |
| tapasin isol 144 | CTG CTC AGG CCA CAA CCT NNK CCC CAA CAA GAA CCC GTA C          |
| tapasin isol 157 | CGT ACT GAT AAC AAT GGC GAC GNN KGT CCT TAC GGT CCT TAC GC     |
| tapasin isol 164 | GGT AGT CCT TAC GGT CCT TAC GNN KAC ACC AGC ACC CAG GG         |
| tapasin isol 166 | CCT TAC GGT CCT TAC GCA TAC ANN KGC ACC CAG GGT CCG            |
| tapasin isol 167 | CGG TCC TTA CGC ATA CAC CAN NKC CCA GGG TGC GAT TGG            |
| tapasin isol 172 | CCA GCA CCC AGG GTG CGA NNK GGA CAA GAC GCA CTC CTC            |
| tapasin isol 180 | ACA AGA CGC ACT CCT CGA CNN KAG CTT TGC GTA CAT GCC A          |
| tapasin isol 182 | CGC ACT CCT CGA CCT TAG CNN KGC GTA CAT GCC ACC AAC C          |
| tapasin isol 206 | CCA CCG TTC GGC CTT GAA NNK AGA CGA CAG CAC TTG GGG            |
| tapasin isol 207 | ACC GTT CGG CCT TGA ATG GNN KCG ACA GCA CTT GGG GAA            |
| tapasin isol 209 | TCG GCC TTG AAT GGA GAC GAN NKC ACT TGG GGA AGG GCC A          |
| tapasin isol 210 | GGC CTT GAA TGG AGA CGA CAG NNK TTG GGG AAG GGC CAT TTG        |
| tapasin isol 211 | TTG AAT GGA GAC GAC AGC ACN NKG GGA AGG GCC ATT TGC T          |
| tapasin isol 212 | ATG GAG ACG ACA GCA CTT GNN KAA GGG CCA TTT GCT GTT GG         |
| tapasin isol 213 | AGA CGA CAG CAC TTG GGG NNK GGC CAT TTG CTG TTG GC             |
| tapasin isol 214 | ACG ACA GCA CTT GGG GAA GNN KCA TTT GCT GTT GGC TGC TAC        |
| tapasin isol 238 | ACA AGA GGG AGC CGT AGC TNN KGC TGC GTG GGA TGA TGA            |
| tapasin isol 241 | GCC GTA GCT TTT GCT GCG NNK GAT GAT GAC GAA CCA TGG GG         |
| tapasin isol 257 | TGG ACT GGA AAC GGG ACT TTC NNK CTG CCA ACA GTA CAG CCC        |
| tapasin isol 262 | CTT TCT GGC TGC CAA CAG TAN NKC CCT TTC AAG AAG GAA CGT ATC    |
| tapasin isol 268 | AGT ACA GCC CTT TCA AGA AGG ANN KTA TCT GGC CAC CAT CCA TTT G  |
| tapasin isol 269 | CAG CCC TTT CAA GAA GGA ACG NNK CTG GCC ACC ATC CAT TTG C      |
| tapasin isol 270 | AGC CCT TTC AAG AAG GAA CGT ATN NKG CCA CCA TCC ATT TGC CT     |
| tapasin isol 272 | CAA GAA GGA ACG TAT CTG GCC NNK ATC CAT TTG CCT TAT CTG CAA G  |
| tapasin isol 279 | CCA CCA TCC ATT TGC CTT ATC TGN NKG GCC AGG TCA CAC TTG AA     |
| tapasin isol 281 | CCA TTT GCC TTA TCT GCA AGG CNN KGT CAC ACT TGA ACT CGC TG     |
| tapasin isol 282 | TGC CTT ATC TGC AAG GCC AGN NKA CAC TTG AAC TCG CTG TCT AT     |
| tapasin isol 283 | CTT ATC TGC AAG GCC AGG TCN NKC TTG AAC TCG CTG TCT ATA AAC C  |
| tapasin isol 285 | GCA AGG CCA GGT CAC ACT TNN KCT CGC TGT CTA TAA ACC GCC        |
| tapasin isol 287 | GGC CAG GTC ACA CTT GAA CTC NNK GTC TAT AAA CCG CCT AAG GTG A  |
| tapasin isol 290 | CAC ACT TGA ACT CGC TGT CTA TNN KCC GCC TAA GGT GAG TCT CA     |
| tapasin isol 295 | CTG TCT ATA AAC CGC CTA AGG TGN NKC TCA TGC CCG CAA CTT TG     |
| tapasin isol 313 | GGC GAA GCT CCA CCT GAA NNK CTC TGT TTG GTA TCC CAT TTC TAC    |
| tapasin isol 318 | CAC CTG AAT TGC TCT GTT TGG TAN NKC ATT TCT ACC CCA GTG GTG G  |
| tapasin isol 321 | TGC TCT GTT TGG TAT CCC ATT TCN NKC CCA GTG GTG CCT TTG        |
| tapasin isol 322 | GCT CTG TTT GGT ATC CCA TTT CTA CNN KAG TGG TGG CCT TGA AGT G  |
| tapasin isol 323 | GTT TGG TAT CCC ATT TCT ACC CCN NKG GTG GCC TTG AAG TGG AA     |
| tapasin isol 324 | TGG TAT CCC ATT TCT ACC CCA GTN NKG GCC TTG AAG TGG AAT GGG    |
| tapasin isol 325 | TCC CAT TTC TAC CCC AGT GGT NNK CTT GAA GTG GAA TGG GAA CTT AG |
| tapasin isol 326 | TTC TAC CCC AGT GGT GGC NNK GAA GTG GAA TGG GAA CTT AGA GG     |
| tapasin isol 327 | TAC CCC AGT GGT GGC CTT NNK GTG GAA TGG GAA CTT AGA GGA G      |
| tapasin isol 328 | CCC CAG TGG TGG CCT TGA ANN KGA ATG GGA ACT TAG AGG AGG AC     |
| tapasin isol 329 | CAG TGG TGG CCT TGA AGT GNN KTG GGA ACT TAG AGG AGG ACC        |
| tapasin isol 333 | GCC TTG AAG TGG AAT GGG AAC TTN NKG GAG GAC CAG GTG GTC G      |
| tapasin isol 33R | GTC TTC AAC AAA CCA ACA CTC GA                                 |
| tapasin isol 34R | AGC GTC TTC AAC AAA CCA ACA                                    |
| tapasin isol 35R | ACT AGC GTC TTC AAC AAA CCA A                                  |
| tapasin isol 36R | ACC ACT AGC GTC TTC AAC AAA                                    |
| tapasin isol 37R | TTT ACC ACT AGC GTC TTC AAC AA                                 |
| tapasin isol 38R | CCC TTT ACC ACT AGC GTC TTC                                    |

|                   |                                   |
|-------------------|-----------------------------------|
| tapasin isol 39R  | CAG CCC TTT ACC ACT AGC GT        |
| tapasin isol 88R  | TGG AGC ACC TCT TGG GTA           |
| tapasin isol 90R  | CGG TGC TGG AGC ACC TCT           |
| tapasin isol 92R  | GCA ATG CGG TGC TGG AGC           |
| tapasin isol 94R  | CAT CTC GCA ATG CGG TGC           |
| tapasin isol 95R  | ACT CAT CTC GCA ATG CGG T         |
| tapasin isol 96R  | CCG ACT CAT CTC GCA ATG CG        |
| tapasin isol 97R  | GAA CCG ACT CAT CTC GCA A         |
| tapasin isol 98R  | AAC GAA CCG ACT CAT CTC GC        |
| tapasin isol 99R  | AGG AAC GAA CCG ACT CAT CT        |
| tapasin isol 102R | CGC AGG CAA AGG AAC GAA           |
| tapasin isol 125R | CAG CCA CGC TCC ATC AAG           |
| tapasin isol 126R | CAT CAG CCA CGC TCC ATC           |
| tapasin isol 127R | AAC CAT CAG CCA CGC TCC           |
| tapasin isol 128R | GGA AAC CAT CAG CCA CGC T         |
| tapasin isol 129R | TAT GGA AAC CAT CAG CCA CGC       |
| tapasin isol 130R | GCT TAT GGA AAC CAT CAG CCA       |
| tapasin isol 131R | AGA GCT TAT GGA AAC CAT CAG CC    |
| tapasin isol 134R | AAG CAC CGG AGA GCT TAT GG        |
| tapasin isol 135R | TGA AAG CAC CGG AGA GCT           |
| tapasin isol 136R | CAG TGA AAG CAC CGG AGA G         |
| tapasin isol 140R | GAG CAG TGA TGA CAG TGA AAG C     |
| tapasin isol 144R | AGG TTG TGG CCT GAG CAG           |
| tapasin isol 157R | CGT CGC CAT TGT TAT CAG TAC G     |
| tapasin isol 164R | CGT AAG GAC CGT AAG GAC TAC C     |
| tapasin isol 166R | TGT ATG CGT AAG GAC CGT AAG G     |
| tapasin isol 167R | TGG TGT ATG CGT AAG GAC CG        |
| tapasin isol 172R | TCG CAC CCT GGG TGC TGG           |
| tapasin isol 180R | GTC GAG GAG TGC GTC TTG T         |
| tapasin isol 182R | GCT AAG GTC GAG GAG TGC G         |
| tapasin isol 206R | TTC AAG GCC GAA CGG TGG           |
| tapasin isol 207R | CCA TTC AAG GCC GAA CGG T         |
| tapasin isol 209R | TCG TCT CCA TTC AAG GCC GA        |
| tapasin isol 210R | CTG TCG TCT CCA TTC AAG GCC       |
| tapasin isol 211R | GTG CTG TCG TCT CCA TTC AA        |
| tapasin isol 212R | CAA GTG CTG TCG TCT CCA T         |
| tapasin isol 213R | CCC CAA GTG CTG TCG TCT           |
| tapasin isol 214R | CTT CCC CAA GTG CTG TCG T         |
| tapasin isol 238R | AGC TAC GGC TCC CTC TTG T         |
| tapasin isol 241R | CGC AGC AAA AGC TAC GGC           |
| tapasin isol 257R | GAA AGT CCC GTT TCC AGT CCA       |
| tapasin isol 262R | TAC TGT TGG CAG CCA GAA AG        |
| tapasin isol 268R | TCC TTC TTG AAA GGG CTG TAC T     |
| tapasin isol 269R | CGT TCC TTC TTG AAA GGG CTG       |
| tapasin isol 270R | ATA CGT TCC TTC TTG AAA GGG CT    |
| tapasin isol 272R | GGC CAG ATA CGT TCC TTC TTG       |
| tapasin isol 279R | CAG ATA AGG CAA ATG GAT GGT GG    |
| tapasin isol 281R | GCC TTG CAG ATA AGG CAA ATG G     |
| tapasin isol 282R | CTG GCC TTG CAG ATA AGG CA        |
| tapasin isol 283R | GAC CTG GCC TTG CAG ATA AG        |
| tapasin isol 285R | AAG TGT GAC CTG GCC TTG C         |
| tapasin isol 287R | GAG TTC AAG TGT GAC CTG GCC       |
| tapasin isol 290R | ATA GAC AGC GAG TTC AAG TGT G     |
| tapasin isol 295R | CAC CTT AGG CGG TTT ATA GAC AG    |
| tapasin isol 313R | TTC AGG TGG AGC TTC GCC           |
| tapasin isol 318R | TAC CAA ACA GAG CAA TTC AGG TG    |
| tapasin isol 321R | GAA ATG GGA TAC CAA ACA GAG CA    |
| tapasin isol 322R | GTA GAA ATG GGA TAC CAA ACA GAG C |
| tapasin isol 323R | GGG GTA GAA ATG GGA TAC CAA AC    |
| tapasin isol 324R | ACT GGG GTA GAA ATG GGA TAC CA    |
| tapasin isol 325R | ACC ACT GGG GTA GAA ATG GGA       |
| tapasin isol 326R | GCC ACC ACT GGG GTA GAA           |
| tapasin isol 327R | AAG GCC ACC ACT GGG GTA           |
| tapasin isol 328R | TTC AAG GCC ACC ACT GGG G         |
| tapasin isol 329R | CAC TTC AAG GCC ACC ACT G         |
| tapasin isol 333R | AAG TTC CCA TTC CAC TTC AAG GC    |



|                   |                                                                |
|-------------------|----------------------------------------------------------------|
| tapasin isol 342  | GAC CAG GTG GTC GAT CTC AGN NKG CTG AAG GGC AGC GAT            |
| tapasin isol 343  | CCA GGT GGT CGA TCT CAG AAA NNK GAA GGG CAG CGA TGG C          |
| tapasin isol 344  | GGT GGT CGA TCT CAG AAA GCT NNK GGG CAG CGA TGG CTC            |
| tapasin isol 345  | TGG TCG ATC TCA GAA AGC TGA ANN KCA GCG ATG GCT CTC CG         |
| tapasin isol 346  | TCG ATC TCA GAA AGC TGA AGG GNN KCG ATG GCT CTC CGC TC         |
| tapasin isol 347  | CTC AGA AAG CTG AAG GGC AGN NKT GGC TCT CCG CTC TCA G          |
| tapasin isol 348  | AAA GCT GAA GGG CAG CGA NNK CTC TCC GCT CTC AGG CA             |
| tapasin isol 349  | GCT GAA GGG CAG CGA TGG NNK TCC GCT CTC AGG CAC C              |
| tapasin isol 350  | GAA GGG CAG CGA TGG CTC NNK GCT CTC AGG CAC CAC TC             |
| tapasin isol 351  | GGG CAG CGA TGG CTC TCC NNK CTC AGG CAC CAC TCA GAC            |
| tapasin isol 352  | CAG CGA TGG CTC TCC GCT NNK AGG CAC CAC TCA GAC GG             |
| tapasin isol 353  | GCG ATG GCT CTC CGC TCT CNN KCA CCA CTC AGA CGG ATC TG         |
| tapasin isol 354  | TGG CTC TCC GCT CTC AGG NNK CAC TCA GAC GGA TCT GTA TCA C      |
| tapasin isol 355  | CTC TCC GCT CTC AGG CAC NNK TCA GAC GGA TCT GTA TCA CTG T      |
| tapasin isol 356  | TCC GCT CTC AGG CAC CAC NNK GAC GGA TCT GTA TCA CTG TCA        |
| tapasin isol 357  | CGC TCT CAG GCA CCA CTC ANN KGG ATC TGT ATC ACT GTC AGG G      |
| tapasin isol 358  | TCT CAG GCA CCA CTC AGA CNN KTC TGT ATC ACT GTC AGG GCA        |
| tapasin isol 359  | AGG CAC CAC TCA GAC GGA NNK GTA TCA CTG TCA GGG CAT TTG        |
| tapasin isol 360  | GGC ACC ACT CAG ACG GAT CTN NKT CAC TGT CAG GGC ATT TGC        |
| tapasin isol 361  | CAC CAC TCA GAC GGA TCT GTA NNK CTG TCA GGG CAT TTG CAG C      |
| tapasin isol 362  | ACC ACT CAG ACG GAT CTG TAT CAN NKT CAG GGC ATT TGC AGC C      |
| tapasin isol 363  | ACT CAG ACG GAT CTG TAT CAC TGN NKG GGC ATT TGC AGC CAC C      |
| tapasin isol 365  | CGG ATC TGT ATC ACT GTC AGG GNN KTT GCA GCC ACC GCC            |
| tapasin isol 367  | TGT ATC ACT GTC AGG GCA TTT GNN KCC ACC GCC AGT TAC CAC        |
| tapasin isol 381  | AGC AGC ATG GAG CTC GGT ATN NKT GTC GCA TTC ACC ACC C          |
| tapasin isol 382  | GCA TGG AGC TCG GTA TGC GNN KCG CAT TCA CCA CCC TAG C          |
| tapasin isol 386  | GGT ATG CGT GTC GCA TTC ACN NKC CTA GCC TTC CGG CGT            |
| tapasin isol 387  | TGC GTG TCG CAT TCA CCA CNN KAG CCT TCC GGC GTC A              |
| tapasin isol 390  | CGC ATT CAC CAC CCT AGC CTT NNK GCG TCA GGA AGA TCA GCG        |
| tapasin isol 30   | TGC GTT AAT CGA GTG TTG GTT TNN KGA AGA CGC TAG TGG TAA AGG G  |
| tapasin isol 31   | CCG TAA TCG AGT GTT GGT TTG TTN NKG ACG CTA GTG GTA AAG GGC    |
| tapasin isol 32   | TAA TCG AGT GTT GGT TTG TTG AAN NKG CTA GTG GTA AAG GGC TGG    |
| tapasin isol 40   | TAG TGG TAA AGG GCT GGC TNN KCG GCC AGG CGC AC                 |
| tapasin isol 297  | AAC CGC CTA AGG TGA GTC TCN NKC CCG CAA CTT TGG CTA GG         |
| tapasin isol 314  | GGC GAA GCT CCA CCT GAA TTG NNK TGT TTG GTA TCC CAT TTC TAC CC |
| tapasin isol 316  | GCT CCA CCT GAA TTG CTC TGT NNK GTA TCC CAT TTC TAC CCC AGT G  |
| tapasin isol 342R | CTG AGA TCG ACC ACC TGG TC                                     |
| tapasin isol 343R | TTT CTG AGA TCG ACC ACC TGG                                    |
| tapasin isol 344R | AGC TTT CTG AGA TCG ACC ACC                                    |
| tapasin isol 345R | TTC AGC TTT CTG AGA TCG ACC A                                  |
| tapasin isol 346R | CCC TTC AGC TTT CTG AGA TCG A                                  |
| tapasin isol 347R | CTG CCC TTC AGC TTT CTG AG                                     |
| tapasin isol 348R | TCG CTG CCC TTC AGC TTT                                        |
| tapasin isol 349R | CCA TCG CTG CCC TTC AGC                                        |
| tapasin isol 350R | GAG CCA TCG CTG CCC TTC                                        |
| tapasin isol 351R | GGA GAG CCA TCG CTG CCC                                        |
| tapasin isol 352R | AGC GGA GAG CCA TCG CTG                                        |
| tapasin isol 353R | GAG AGC GGA GAG CCA TCG C                                      |
| tapasin isol 354R | CCT GAG AGC GGA GAG CCA                                        |
| tapasin isol 355R | GTG CCT GAG AGC GGA GAG                                        |
| tapasin isol 356R | GTG GTG CCT GAG AGC GGA                                        |
| tapasin isol 357R | TGA GTG GTG CCT GAG AGC G                                      |
| tapasin isol 358R | GTC TGA GTG GTG CCT GAG A                                      |
| tapasin isol 359R | TCC GTC TGA GTG GTG CCT                                        |
| tapasin isol 360R | AGA TCC GTC TGA GTG GTG CC                                     |
| tapasin isol 361R | TAC AGA TCC GTC TGA GTG GTG                                    |
| tapasin isol 362R | TGA TAC AGA TCC GTC TGA GTG GT                                 |
| tapasin isol 363R | CAG TGA TAC AGA TCC GTC TGA GT                                 |
| tapasin isol 365R | CCC TGA CAG TGA TAC AGA TCC G                                  |
| tapasin isol 367R | CAA ATG CCC TGA CAG TGA TAC A                                  |
| tapasin isol 381R | ATA CCG AGC TCC ATG CTG CT                                     |
| tapasin isol 382R | CGC ATA CCG AGC TCC ATG C                                      |
| tapasin isol 386R | GTG AAT GCG ACA CGC ATA CC                                     |
| tapasin isol 387R | GTG GTG AAT GCG ACA CGC A                                      |
| tapasin isol 390R | AAG GCT AGG GTG GTG AAT GCG                                    |
| tapasin isol 30R  | AAA CCA ACA CTC GAT TAC GGC A                                  |

|                            |                                                                   |
|----------------------------|-------------------------------------------------------------------|
| tapasin isol 31R           | AAC AAA CCA ACA CTC GAT TAC GG                                    |
| tapasin isol 32R           | TTC AAC AAA CCA ACA CTC GAT TA                                    |
| tapasin isol 40R           | AGC CAG CCC TTT ACC ACT A                                         |
| tapasin isol 297R          | GAG ACT CAC CTT AGG CGG TT                                        |
| tapasin isol 314R          | CAA TTC AGG TGG AGC TTC GCC                                       |
| tapasin isol 316R          | ACA GAG CAA TTC AGG TGG AGC                                       |
| TAPBPR E102A for           | GGA AGG AGG TGA CCT GTG CTA TCT CCC GCT ACT TTC                   |
| TAPBPR M122A for           | CAG CAG CTT GGT TCG CTG CCA ACG TGC AGG TCT C                     |
| TAPBPR G212A for           | GAC TGC AGC ACA AGG CCA GGG GTC AGT TGG TG                        |
| TAPBPR I261A for           | GAC GAG GGG ACC TAC GCT TGC CAG ATC ACC ACC                       |
| TAPBPR S333A for           | GTG CCT CCT TCT CCG CCC TCA GGC AAA GCG TG                        |
| TAPBPR E102A rev           | GAA AGT AGC GGG AGA TAG CAC AGG TCA CCT CCT TCC                   |
| TAPBPR M122A rev           | GAG ACC TGC ACG TTG GCA GCG AAC CAA GCT GCT G                     |
| TAPBPR G212A rev           | CAC CAA CTG ACC CCT GGC CTT GTG CTG CAG TC                        |
| TAPBPR I261A rev           | GGT GGT GAT CTG GCA AGC GTA GGT CCC CTC GTC                       |
| TAPBPR S333A rev           | CAC GCT TTG CCT GAG GGC GGA GAA GGA GGC AC                        |
| TAPBPR-delta24-36-R        | CAC AAG GGA GGC CCT TGC GTC CTT CAC CAG GAA ACA GTC               |
| TAPBPR-delta24-26-F        | GAC TGT TTC CTG GTG AAG GAC GCA AGG GCC TCC CTT GTG               |
| TAPBPR-dALAS-for           | GACGGTGCACCGGTGGAagtggagacagggcaaggg                              |
| TAPBPR-dALAS-rev           | cccttgccctgctcactTCCACGGTGCACCGTC                                 |
| Tapasin-TAPBPR22-25 For    | CAC CGT GGA GCT CTC GCC AGC AGT GAG GAC AAA CGG CCA GGC GCA CTT C |
| Tapasin-TAPBPR22-25-Rev    | TGGCGAGAGCTCCACGGTGCACCGTCCTTAACAAACCAACTCGATTACGG                |
| Tapasin-d2steps-F          | CGA GTG TTG GTT TGT TGA AGA CGG TCT GGC TAA ACG GCC AGG           |
| Tapasin-d2steps-R          | CCT GGC CGT TTA GCC AGA CCG TCT TCA ACA AAC CAA CAC TCG           |
| Tapasin-G15L-F             | GTT GAA GAC GCT AGT CTG AAA GGG CTG GCT AAA CGG C                 |
| Tapasin-G15L-R             | GCC GTT TAG CCA GCC CTT TCA GAC TAG CGT CTT CAA C                 |
| Tapasin-G15E-F             | GTT GAA GAC GCT AGT GAA AAA GGG CTG GCT AAA CGG CCA G             |
| Tapasin-G15E-R             | CTG GCC GTT TAG CCA GCC CTT TTT CAC TAG CGT CTT CAA C             |
| Tapasin-L18G-F             | CTA GTG GTA AAG GGG GCG CTA AAC GGC CAG G                         |
| Tapasin-L18G-R             | CCT GGC CGT TTA GCG CCC CCT TTA CCA CTA G                         |
| Tapasin-L18E-F             | GCT AGT GGT AAA GGG GAA GCT AAA CGG CCA GGC G                     |
| Tapasin-L18E-R             | CGC CTG GCC GTT TAG CTT CCC CTT TAC CAC TAG C                     |
| Tapasin-L18K-F             | CGC TAG TGG TAA AGG GAA AGC TAA ACG GCC AGG CG                    |
| Tapasin-L18K-R             | CGC CTG GCC GTT TAG CTT TCC CTT TAC CAC TAG CG                    |
| Tapasin-D2 to d3steps F    | CGA GTG TTG GTT TGT TGA AGG TGC TAA ACG GCC AGG CG                |
| Tapasin-D2 to d3steps R    | CGC CTG GCC GTT TAG CAC CTT CAA CAA ACC AAC ACT CG                |
| Illumina tapasin 5F        | TCTTTCCCTACACGACGCTCTTCCGATCTGCCGTAATCGAGTGTGGT                   |
| Illumina tapasin 235R      | GTGACTGGAGTTCAGACGTGTGCTCTTCCGATCTAAGGAACGAACCGACTCATC            |
| Illumina tapasin 183F      | TCTTTCCCTACACGACGCTCTTCCGATCTGTACCCAAGAGGTGCTCCA                  |
| Illumina tapasin 405R      | GTGACTGGAGTTCAGACGTGTGCTCTTCCGATCTCGCCATTGTTATCAGTACGG            |
| Illumina tapasin 386F      | TCTTTCCCTACACGACGCTCTTCCGATCTCCGTAATGATAACAATGGCG                 |
| Illumina tapasin 602R      | GTGACTGGAGTTCAGACGTGTGCTCTTCCGATCTGTAGCAGCCAACAGCAAATG            |
| Illumina tapasin 630F      | TCTTTCCCTACACGACGCTCTTCCGATCTAGCACAAGAGGGAGCCGTA                  |
| Illumina tapasin 876R      | GTGACTGGAGTTCAGACGTGTGCTCTTCCGATCTTCAGGTGGAGTTCGCCA               |
| Illumina tapasin 858F      | TCTTTCCCTACACGACGCTCTTCCGATCTGGCGAAGCTCCACCTGAA                   |
| Illumina tapasin 1040R     | GTGACTGGAGTTCAGACGTGTGCTCTTCCGATCTGCAAATGCCCTGACAGTGA             |
| Illumina tapasin 951F      | TCTTTCCCTACACGACGCTCTTCCGATCTGGTTCGATCTCAGAAAAGCTG                |
| Illumina tapasin 1135R     | GTGACTGGAGTTCAGACGTGTGCTCTTCCGATCTTACCTCCGCTGATCTTCT              |
| Illumina TAPBPR 273 for    | TCTTTCCCTACACGACGCTCTTCCGATcttgctccatgctgactgca                   |
| Illumina TAPBPR 483 rev    | GTGACTGGAGTTCAGACGTGTGCTCTTCCGATCTCAGTGGCAAGTTCAGCGTTG            |
| Illumina TAPBPR 466 for    | TCTTTCCCTACACGACGCTCTTCCGATCTacgctgaactggcactgag                  |
| Illumina TAPBPR 671 rev    | GTGACTGGAGTTCAGACGTGTGCTCTTCCGATCTGTCCAGTGATACACCAACTG            |
| Illumina TAPBPR 649 for    | TCTTTCCCTACACGACGCTCTTCCGATCTggtcagttgggtacagctg                  |
| Illumina TAPBPR 920 rev    | GTGACTGGAGTTCAGACGTGTGCTCTTCCGATCTCCAGCAATGTCGAGATGAG             |
| Illumina TAPBPR 875 for    | TCTTTCCCTACACGACGCTCTTCCGATCTggcaaacgaagctgctg                    |
| Illumina TAPBPR 1148 rev   | GTGACTGGAGTTCAGACGTGTGCTCTTCCGATCTGGGACAACCTGGGTGCTG              |
| Illumina Start Adaptamer   | AATGATACGGCGACCACCGAGATCTACACTCTTTCCCTACACGACGCTCTTCCGATCT        |
| Illumina Index 1 Adaptamer | CAAGCAGAAGACGGCATAACGAGATCGTATGTGACTGGAGTTCAGACGTGTGCTCTTC        |
| Illumina Index 2 Adaptamer | CAAGCAGAAGACGGCATAACGAGATACATCGGTGACTGGAGTTCAGACGTGTGCTCTTC       |
| Illumina Index 3 Adaptamer | CAAGCAGAAGACGGCATAACGAGATGCCTAAGTACTGGAGTTCAGACGTGTGCTCTTC        |
| Illumina Index 4 Adaptamer | CAAGCAGAAGACGGCATAACGAGATTGGTCAGTACTGGAGTTCAGACGTGTGCTCTTC        |
| Illumina Index 5 Adaptamer | CAAGCAGAAGACGGCATAACGAGATCACTGTGTGACTGGAGTTCAGACGTGTGCTCTTC       |
| Illumina Index 6 Adaptamer | CAAGCAGAAGACGGCATAACGAGATATTGGCGTACTGGAGTTCAGACGTGTGCTCTTC        |
| Illumina Index 7 Adaptamer | CAAGCAGAAGACGGCATAACGAGATGATCTGGTACTGGAGTTCAGACGTGTGCTCTTC        |
| Illumina Index 8 Adaptamer | CAAGCAGAAGACGGCATAACGAGATTCAAGTGTACTGGAGTTCAGACGTGTGCTCTTC        |
| Illumina Index 9 Adaptamer | CAAGCAGAAGACGGCATAACGAGATCTGATCGTACTGGAGTTCAGACGTGTGCTCTTC        |

|                             |                                                             |
|-----------------------------|-------------------------------------------------------------|
| Illumina Index 10 Adaptamer | CAAGCAGAAGACGGCATAACGAGATGTAGCCGTGACTGGAGTTCAGACGTGTGCTCTTC |
| Illumina Index 11 Adaptamer | CAAGCAGAAGACGGCATAACGAGATTACAAGGTGACTGGAGTTCAGACGTGTGCTCTTC |
| Illumina Index 12 Adaptamer | CAAGCAGAAGACGGCATAACGAGATATCAGTGTGACTGGAGTTCAGACGTGTGCTCTTC |
| Illumina Index 13 Adaptamer | CAAGCAGAAGACGGCATAACGAGATGCTCATGTGACTGGAGTTCAGACGTGTGCTCTTC |
| Illumina Index 14 Adaptamer | CAAGCAGAAGACGGCATAACGAGATAGGAATGTGACTGGAGTTCAGACGTGTGCTCTTC |
| Illumina Index 15 Adaptamer | CAAGCAGAAGACGGCATAACGAGATCTTTTGGTGACTGGAGTTCAGACGTGTGCTCTTC |
| Illumina Index 16 Adaptamer | CAAGCAGAAGACGGCATAACGAGATTAGTTGGTGACTGGAGTTCAGACGTGTGCTCTTC |
| Illumina Index 17 Adaptamer | CAAGCAGAAGACGGCATAACGAGATCCGGTGGTGACTGGAGTTCAGACGTGTGCTCTTC |
| Illumina Index 18 Adaptamer | CAAGCAGAAGACGGCATAACGAGATTTGACTGTGACTGGAGTTCAGACGTGTGCTCTTC |
| Illumina Index 19 Adaptamer | CAAGCAGAAGACGGCATAACGAGATGGAAGTGTGACTGGAGTTCAGACGTGTGCTCTTC |
| Illumina Index 20 Adaptamer | CAAGCAGAAGACGGCATAACGAGATTGACATGTGACTGGAGTTCAGACGTGTGCTCTTC |
| Illumina Index 21 Adaptamer | CAAGCAGAAGACGGCATAACGAGATGGACGGGTGACTGGAGTTCAGACGTGTGCTCTTC |
| Illumina Index 22 Adaptamer | CAAGCAGAAGACGGCATAACGAGATCTCTACGTGACTGGAGTTCAGACGTGTGCTCTTC |
| Illumina Index 23 Adaptamer | CAAGCAGAAGACGGCATAACGAGATGCCGACGTGACTGGAGTTCAGACGTGTGCTCTTC |
| Illumina Index 24 Adaptamer | CAAGCAGAAGACGGCATAACGAGATTTTACGTGACTGGAGTTCAGACGTGTGCTCTTC  |
| Illumina Index 25 Adaptamer | CAAGCAGAAGACGGCATAACGAGATGGCCACGTGACTGGAGTTCAGACGTGTGCTCTTC |
| Illumina Index 26 Adaptamer | CAAGCAGAAGACGGCATAACGAGATCGAAACGTGACTGGAGTTCAGACGTGTGCTCTTC |
| Illumina Index 27 Adaptamer | CAAGCAGAAGACGGCATAACGAGATCGTACGGTGACTGGAGTTCAGACGTGTGCTCTTC |
| Illumina Index 28 Adaptamer | CAAGCAGAAGACGGCATAACGAGATCCACTCGTGACTGGAGTTCAGACGTGTGCTCTTC |
| Illumina Index 29 Adaptamer | CAAGCAGAAGACGGCATAACGAGATGCTACCGTGACTGGAGTTCAGACGTGTGCTCTTC |
| Illumina Index 30 Adaptamer | CAAGCAGAAGACGGCATAACGAGATAAGCTAGTGACTGGAGTTCAGACGTGTGCTCTTC |
| pCEP4-MCS-for               | GAT CTC TAG AAG CTG GGT ACC                                 |
| pCEP4-MCS-rev               | CAA TGT ATC TTA TCA TGT CTG GAT CC                          |
| TAPBPR L30K for             | GCGCACCGTGGAGCTAAAGCCAGCAGTGAGGAC                           |
| TAPBPR L30K rev             | GTCCTCACTGTGGCTTTAGTCTCCACGGTGCGC                           |
| TAPBPR D35F for             | CTCGCCAGCAGTGAGTTCAGGGCAAGGGCCTC                            |
| TAPBPR D35F rev             | GAGGCCCTTGCCCTGAACTCACTGCTGGCGAG                            |
| TAPBPR D35R for             | CTCGCCAGCAGTGAGCGCAGGGCAAGGGCCTC                            |
| TAPBPR D35R rev             | GAGGCCCTTGCCCTGCGCTCACTGCTGGCGAG                            |
| TAPBPR D35N for             | CTCGCCAGCAGTGAGAACAGGGCAAGGGCCTC                            |
| TAPBPR D35N rev             | GAGGCCCTTGCCCTGTTCCTCACTGCTGGCGAG                           |
| TAPBPR A25L for             | CTGGTGAAGGACGGTCTGCACCGTGGAGCTCTC                           |
| TAPBPR A25L rev             | GAGAGCTCCACGGTGCAGACCGTCCTTACCAG                            |
| TAPBPR H26F for             | GTGAAGGACGGTGCCTCCGTGGAGCTCTCGC                             |
| TAPBPR H26F rev             | GCGAGAGCTCCACGGAAACGCACCGTCCTTAC                            |
| TAPBPR R27E for             | GAAGGACGGTGCAGCAGAAAGGAGCTCTCGCCAGC                         |
| TAPBPR R27E rev             | GCTGGCGAGAGCTCCTTCGTGCGCACCGTCCTTC                          |
| TAPBPR A29L for             | GTGCGCACCGTGGACTTCTCGCCAGCAGTG                              |
| TAPBPR A29L rev             | CACTGCTGGCGAGAAGTCCACGGTGCAC                                |
| TAPBPR A31W for             | CACCGTGGAGCTCTTGGAGCAGTGAGGACAGG                            |
| TAPBPR A31W rev             | CCTGTCTCACTGCTCCAGAGAGCTCCACGGTG                            |
| TAPBPR S32L for             | GTGGAGCTCTCGCCCTCAGTGAGGACAGGGC                             |
| TAPBPR S32L rev             | GCCCTGTCTCACTGAGGGCGAGAGCTCCAC                              |
| TAPBPR S32Y for             | GTGGAGCTCTCGCTACAGTGAGGACAGGGC                              |
| TAPBPR S32Y rev             | GCCCTGTCTCACTGTAGGCGAGAGCTCCAC                              |
| TAPBPR R27W for             | GAAGGACGGTGCAGCACTGGGAGCTCTCGCCAGC                          |
| TAPBPR R27W rev             | GCTGGCGAGAGCTCCCAAGTGCACCGTCCTTC                            |
| TAPBPR E34I for             | GCTCTCGCCAGCAGTATCGACAGGGCAAGGGC                            |
| TAPBPR E34I rev             | GCCCTTGCCCTGTGATACTGCTGGCGAGAGC                             |
| TAPBPR E34Y for             | GCTCTCGCCAGCAGTTATGACAGGGCAAGGGC                            |
| TAPBPR E34Y rev             | GCCCTTGCCCTGTGATACTGCTGGCGAGAGC                             |
| TAPBPR D35G for             | CTCGCCAGCAGTGAGGGCAAGGGCCTC                                 |
| TAPBPR D35G rev             | GAGGCCCTTGCCCTGCCCTCACTGCTGGCGAG                            |
| TAPBPR-R405 nostop rev      | TCTCCGCTCTGGTGGGACAA                                        |
| Tapasin-S386-TAPBPR-fusion  | TTGTCCCACCAGAGCGGAGATCAGGGCCCTCCCTTGA                       |
| Tapasin-T484-rev            | GTGGATGTCTCGAGTCATTAAGTAGCATGCTCAAAGAGTCC                   |
